# Supplementary material for: Comprehensive understanding of iron-catalyzed Fischer–Tropsch synthesis product distribution with extensive reliable data
Source: Royal Society of Chemistry journal article supplement (doi:10.1039/d3cy01218b), 2023-01-01
Supplement: d3cy01218b2.pdf [file d3cy01218b2.pdf]

1

## Supporting Information

2

### Comprehensive understanding of iron- catalyzed Fischer-Tropsch synthesis product distribution via extensive reliable data

3

4 Kunpeng Song,<sup>a,b</sup> XiaoFeng Li,<sup>c</sup> Wentao Li,<sup>c</sup> Xiong Zhou,<sup>c</sup> Liping

5 Zhou,<sup>\*c</sup>, Hongwei Xiang,<sup>a,c</sup>, Yong Yang,<sup>a,c</sup> and Yongwang Li<sup>a,c</sup>

6

7 <sup>a</sup>State Key Laboratory of Coal Conversion, Institute of Coal Chemistry,

8 Chinese Academy of Sciences, Taiyuan 030001, PR China

9 <sup>b</sup>University of Chinese Academy of Sciences, Beijing 100049, PR China

10 <sup>c</sup> National Energy Center for Coal to Liquids, Synfuels China Technology

11 Co., Ltd., Huairou District, Beijing 101400, PR China

12

13 Correspondence: Liping Zhou, National Energy Center for Coal to

14 Liquids, Synfuels China Technology Co., Ltd., Huairou District, Beijing

15 101400, PR China. Email: [zhouliping@synfuelschina.com.cn](mailto:zhouliping@synfuelschina.com.cn)

16

17

## 18 **S1 Details of the mechanism model involved in Fig. 1b of the article**

### 19 **S1.1 Schulz-Flory model in Fig. 1b1**

20 Schulz-Flory model is applied in Fig. 1b1. This distribution function is used to  
21 describe the polymerization process, assuming that all surface oligomers are equally  
22 reactive to chain growth and that the rate of carbon-carbon bond formation and product  
23 desorption are constant. As shown in Eq. S1.1, this model predicts the linear  
24 relationship between  $\ln (W_n/n)$  and  $n$ , where  $W_n$  is the weight fraction of product of  
25 carbon number  $n$ , and  $\alpha$  expresses a probability of addition to the monomer or other  
26 surface chains<sup>[1]</sup>.

$$27 \quad \ln \frac{W_n}{n} = \ln \frac{(1-\alpha)^2}{\alpha} + n \cdot \ln \alpha \quad (S1.1)$$

28

### 29 **S1.2 Single-mechanism with diffusion correction in Fig. 1b2**

30 This study uses a diffusion-enhanced  $\alpha$ -olefin re-adsorption model<sup>[2]</sup>. In the chain  
31 growth kinetic model, as shown in Fig. S1-1, surface reaction rate constants are  
32 assumed to be independent of chain length for C2+ surface chains. Re-adsorption rate  
33 constants are assumed to be independent of chain length for C3+  $\alpha$ -olefins, higher for  
34 ethylene, and zero for non-terminal olefin species and for paraffins; thus, any carbon  
35 number effects on  $\alpha$  or on product functionality arise exclusively from physical  
36 transport rather than chemical effects.

37

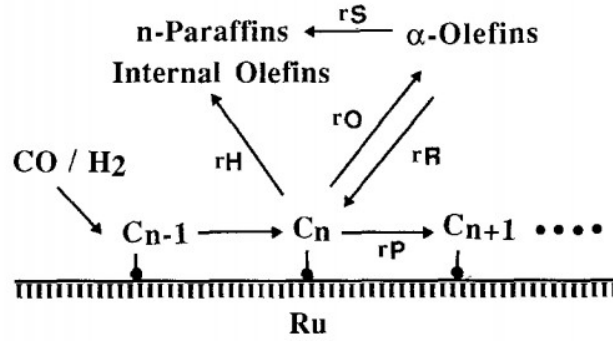

38

39

**Fig. S1-1** Hydrocarbon synthesis chain growth kinetic scheme

40 The steady-state conservation of the catalytic surface chain growth site can be  
 41 expressed as,

$$42 \quad -k_p C_1^* C_n^* + k_p C_1^* C_{n-1}^* - k_o C_n^* - k_h C_n^* + k_r P_n^v / RT = 0 \quad (S1.2)$$

43  $C^*$  is the surface coverage of adsorbed species, and  $P_n^v$  is the Olefin virtual pressure  
 44 in liquid phase. The steady-state conservation between diffusion and reaction can be  
 45 expressed as

$$46 \quad \text{Olefin: } D_n \nabla P_n^v - \rho_p [(k_r + k_s) P_n^v - k_o C_n^*] = 0 \quad (S1.3)$$

$$47 \quad \text{Paraffin: } D_n \nabla Q_n^v + \rho_p [k_s P_n^v + k_h C_n^*] = 0 \quad (S1.4)$$

48 Where,  $D_n$  is the hydrocarbon diffusivities in liquid filled pores.  $\rho_p$  is catalyst pellet  
 49 density.  $Q_n^v$  is the paraffin virtual pressure in liquid phase.

50 In the transport-enhanced re-adsorption model, the carbon number-dependent olefin  
 51 diffusivity is,

$$52 \quad D_n = D_{n,0} e^{-0.3n} \quad (S1.5)$$

53

### 54 **S1.3 Single-mechanism with solubility correction in Fig. 1b3**

55 This study was carried out in stirred tank slurry reactor using a kinetic model with  
 56 solubility enhanced 1-olefin re-adsorption term<sup>[3]</sup>. The mechanism is the addition of 2-

57 olefin formation based on the Van der Laan and Beenackers model<sup>[4]</sup>, as shown in Table  
 58 S1-1.

59 **Table S1-1** Elementary steps of hydrocarbon formation

| Number | Step                                                                                                                                             | rate equation                                                    |
|--------|--------------------------------------------------------------------------------------------------------------------------------------------------|------------------------------------------------------------------|
| HC1    | Initiation – formation of adsorbed methyl species<br>$CH_2-s + H-s \leftrightarrow CH_3-s + s$                                                   | $r_i = k_i \theta_{CH_2-s} \theta_{H-s}$                         |
| HC2    | Propagation:<br>$C_n H_{2n+1}-s + CH_2-s \rightarrow C_{n+1} H_{2n+3}-s + s \quad n = 1, 2, 3 \dots$                                             | $r_p^n = k_p \theta_{CH_2-s} \theta_{C_n H_{2n+1}-s}$            |
| HC3    | Primary termination to n-paraffin (hydrogenation)<br>$CH_3(CH_2)_n-s + H-s \rightarrow C_n H_{2n+2} + 2s \quad n = 1, 2, 3 \dots$                | $r_{t,p}^n = k_{t,p} \theta_{H-s} \theta_{C_n H_{2n+1}-s}$       |
| HC4    | Primary termination to 1-olefin (dehydrogenation and<br>desorption) $C_n H_{2n+1} s + s \rightarrow C_n H_{2n} + H-s + s \quad n = 2, 3 \dots$   | $r_{t,1o}^n = k_{t,1o} \theta_s \theta_{C_n H_{2n+1}-s}$         |
| HC5    | 1-olefin re-adsorption on primary sites<br>$C_n H_{2n} + H-s + s \rightarrow C_n H_{2n+1}-s + s \quad n = 2, 3 \dots$                            | $r_{r,1o}^n = k_{r,1o} \theta_s \theta_{H-s} C_{1-C_n H_{2n}}^s$ |
| HC6    | Primary termination to 2-olefin (dehydrogenation and<br>desorption) $C_n H_{2n+1} s + s \rightarrow 2-C_n H_{2n} + H-s + s \quad n = 4, 5 \dots$ | $r_{t,2o}^n = k_{t,2o} \theta_s \theta_{C_n H_{2n+1}-s}$         |

60 Reaction equations of methane, ethylene, n-paraffin and 1-olefin can be written as:

61 
$$R_{CH_4} = \kappa_{t,p}^{(1)} \frac{\kappa_1}{\kappa_p + \kappa_{t,p}^{(1)}} \quad (S1.6)$$

62 
$$R_{C_2H_6} = \kappa_{t,p}^{(2)} \frac{\kappa_1}{\kappa_p + \kappa_{t,p}^{(1)}} \alpha_2 \quad (S1.7)$$

63 
$$R_{C_n H_{2n+2}} = \frac{\kappa_1}{\kappa_p + \kappa_{t,p}^{(1)}} \prod_{i=2}^n \alpha_i \quad n \geq 3 \quad (S1.8)$$

64 
$$R_{C_2H_4} = \kappa_{1o}^{(2)} \exp(-2c) \frac{\kappa_1}{\kappa_p + \kappa_{t,p}^{(1)}} \alpha_2 \quad (S1.9)$$

65 
$$R_{1-C_n H_{2n}} = \kappa_{1o}^{(2)} \exp(-c * n) \frac{\kappa_1}{\kappa_p + \kappa_{t,p}^{(1)}} \prod_{i=2}^n \alpha_i \quad n \geq 3 \quad (S1.10)$$

$$R_{2-C_nH_{2n}} = \kappa_{t,2o}^{(2)} \frac{\kappa_1}{\kappa_p + \kappa_{t,p}^{(1)}} \prod_{i=2}^n \alpha_i \quad n \geq 4 \quad (S1.11)$$

Where,  $c$  is the carbon number correction term of the vapor-liquid equilibrium(VLE) constant of olefin, which is obtained by the modified Peng–Robinson equation of state in this study.

$$\kappa_1 = k_1 \theta_{CH_2-S} \theta_{H-S}, \quad \kappa_p = \frac{k_1 \theta_{CH_2-S}}{k_{t,p} \theta_{H-S}} \quad (S1.12)$$

$$\kappa_{t,p}^{(1)} = \frac{k_{t,p}^{(1)}}{k_{t,p}}, \quad \kappa_{t,p}^{(2)} = \frac{k_{t,p}^{(2)}}{k_{t,p}}, \quad \kappa_{t,2o} = \frac{k_{t,2o} \theta_S}{k_{t,p} \theta_{H-S}} \quad (S1.13)$$

$$K_{1o}^{(2)} = \frac{k_{t,p}^{(2)}}{(k_{t,p})^2} \frac{k_{t,1o} aSV}{k_{r,1o}^{(2)} (\theta_{H-S})^2 R_g T}, \quad K_{1o} = \frac{1}{k_{t,p}} \frac{k_{t,1o} aSV}{k_{r,1o}^{(2)} (\theta_{H-S})^2 R_g T} \quad (S1.14)$$

$$\alpha_2 = \frac{\kappa_p}{\kappa_p + k_{t,p}^{(2)} + K_{1o}^{(2)} \exp(-2c)} \quad (S1.15)$$

$$\alpha_3 = \frac{\kappa_p}{1 + \kappa_p + K_{1o} \exp(-3c)} \quad (S1.16)$$

$$\alpha_n = \frac{\kappa_p}{1 + \kappa_p + \kappa_{t,2o} + K_{1o} \exp(-cn)} \quad n \geq 4 \quad (S1.17)$$

#### S1.4 Single-mechanism with physisorption correction in Fig. 1b4

The study in Fig. 1b4 is carried out in slurry reactor and rate equations were based on the elementary reactions corresponding to a form of well-known carbide mechanism [5], as shown in Table S1-2.

81

82

83

84

**Table S1-2** FTS reaction pathway and rate equation

| Number              | Step                                                           | rate equation                              |
|---------------------|----------------------------------------------------------------|--------------------------------------------|
| 1 <sup>RDS</sup> -1 | $CO + H-s \rightarrow H-s-CO$                                  | $k_1 P_{CO} [H-s]$                         |
| 1 <sup>RDS</sup> -2 | $CO + CH_3-s \rightarrow CH_3-s-CO$                            | $k_1 P_{CO} [CH_3-s]$                      |
| 1 <sup>RDS</sup> -n | $CO + C_n H_{2n+1}-s \rightarrow C_n H_{2n+1}-s-CO$            | $k_1 P_{CO} [C_n H_{2n+1}-s]$              |
| 2-1                 | $H-s-CO + 2H \rightarrow H-s-C + H_2O$                         | $K_2$                                      |
| 2-2                 | $CH_3-s-CO + 2H \rightarrow CH_3-s-C + H_2O$                   | $K_2$                                      |
| 2-n                 | $C_n H_{2n+1}-s-CO + 2H \rightarrow C_n H_{2n+1}-s-C + H_2O$   | $K_2$                                      |
| 3-1                 | $H-s-C + 2H-s \rightarrow H-s-CH_2 + 2s$                       | $K_3$                                      |
| 3-2                 | $CH_3-s-C + 2H-s \rightarrow CH_3-s-CH_2 + 2s$                 | $K_3$                                      |
|                     | $C_n H_{2n+1}-s-C + 2H-s \rightarrow C_n H_{2n+1}-s-CH_2 + 2s$ |                                            |
| 3-n                 |                                                                | $K_3$                                      |
| 4                   | $C_n H_{2n+1}-s-CH_2 \rightarrow C_n H_{2n+1}-CH_2-s$          | $K_4$                                      |
| 5 <sup>RDS</sup> -1 | $CH_3-s + H_2 \rightarrow CH_4 + H-s$                          | $k_{5M} P_{H_2} [CH_3-s]$                  |
| 5 <sup>RDS</sup> -n | $C_n H_{2n+1}-s + H_2 \rightarrow C_n H_{2n+2} + H-s$          | $k_5 P_{H_2} [C_n H_{2n+1}-s]$             |
| 6 <sup>RDS</sup> -2 | $CH_3CH_2-s \rightarrow C_2H_4 + H-s$                          | $k_{6E,0} e^{c_2} P_{H_2} [CH_3CH_2-s]$    |
| 6 <sup>RDS</sup> -n | $C_n H_{2n+1}-s \rightarrow C_n H_{2n} + H-s$                  | $k_{6,0} e^{c_n} P_{H_2} [C_n H_{2n+1}-s]$ |
| 7                   | $H_2 + 2s \leftrightarrow 2H-s$                                | $K_7$                                      |

86 In the mechanism, chain growth (step 1) and chain termination (steps 5&6) are rate-  
 87 determining steps(RDS), and the rest are fast equilibrium processes. The 1-olefin  
 88 desorption rate constant was assumed to be a function of carbon number due to the  
 89 effect of weak interaction of the hydrocarbon chain with the catalyst surface.

90 Reaction equations of methane, ethylene, n-paraffin and 1-olefin can be written as:

$$91 \quad R_{CH_4} = k_{5M} k_7^{0.5} P_{H_2}^{1.5} \alpha_1 [S] \quad (S1.18)$$

$$92 \quad R_{C_2H_4} = k_{6E,0} e^{2c} \sqrt{K_7 P_{H_2}} \alpha_1 \alpha_2 [S] \quad (S1.19)$$

$$93 \quad R_{C_n H_{2n+2}} = k_5 k_7^{0.5} P_{H_2}^{1.5} \alpha_1 \alpha_2 \prod_{i=3}^n \alpha_i [S] \quad (S1.20)$$

$$94 \quad R_{C_n H_{2n}} = k_{6,0} e^{cn} \sqrt{K_7 P_{H_2}} \alpha_1 \alpha_2 \prod_{i=3}^n \alpha_i [S] \quad (S1.21)$$

95 Where,  $\alpha$  is the chain growth probability factor for a molecule with  $n$  carbon atoms,

$$96 \quad \alpha_n = \frac{k_1 P_{CO}}{k_1 P_{CO} + k_5 P_{H_2} + k_{6,0} e^{cn}} \quad n \geq 3 \quad (S1.22)$$

97 Because methane and ethylene have different termination rate constants, growth  
 98 probabilities for  $n = 1$  and  $n = 2$  should be defined separately:

$$99 \quad \alpha_1 = \frac{k_1 P_{CO}}{k_1 P_{CO} + k_{5M} P_{H_2}} \quad (S1.23)$$

$$100 \quad \alpha_2 = \frac{k_1 P_{CO}}{k_1 P_{CO} + k_5 P_{H_2} + k_{6E,0} e^{2c}} \quad (S1.24)$$

101  $[S]$  is the concentration of vacant sites,

$$102 \quad [S] = 1 / \left\{ 1 + \sqrt{K_7 P_{H_2}} + \sqrt{K_7 P_{H_2}} \left( 1 + \frac{1}{K_4} + \frac{1}{K_3 K_4 P_{H_2}} + \frac{P_{H_2O}}{K_2 K_3 K_4 P_{H_2}} \right) (\alpha_1 + \alpha_1 \alpha_2 + \alpha_1 \alpha_2 \sum_{i=3}^n \prod_{j=3}^i \alpha_j) \right\} \quad (S1.25)$$

103  $c$  is the carbon number correction for the olefin desorption constant,

$$104 \quad c = -\frac{\Delta E}{RT} \quad (S1.26)$$

105 Where,  $\Delta E$  is a contribution in the increase of desorption energy per every  $-CH_2-$   
 106 group.

107

### 108 **S1.5 Single-mechanism in Fig. 1b5**

109 This study was carried out in a fixed bed micro-reactor, and on the basis of proposed  
 110 reaction mechanisms, developed according to the carbide theory and the alkyl  
 111 mechanism, the kinetic expressions for n-paraffins and  $\alpha$ -olefins formation are derived  
 112 [6]. The elementary reaction and rate equation are shown in Table S1-3.

113

114

115

116

117

118

**Table S1-3** Mechanism of carbide in FTS

| Number | Step                                                               | rate equation                                                                           |
|--------|--------------------------------------------------------------------|-----------------------------------------------------------------------------------------|
| 1      | $H_2 + 2s \rightarrow 2H - s$                                      | $r_{H_2} = k_{H_2} P_{H_2} \theta^2 \theta_{H^*}^{-1}$                                  |
| 2a     | $CO + s \rightarrow CO - s$                                        | $r_M = k_M P_{CO} \theta$                                                               |
| 2b     | $CO - s + s \rightarrow C - s + O - s$                             | --                                                                                      |
| 2c     | $C - s + H - s \rightarrow CH - s + s$                             | --                                                                                      |
| 2d     | $CH - s + H - s \rightarrow CH_2 - s + s$                          | --                                                                                      |
| 2e     | $O - s + H - s \rightarrow OH - s + s$                             | --                                                                                      |
| 2f     | $OH - s + H - s \rightarrow H_2O + 2s$                             | --                                                                                      |
| 3      | $CH_2 - s + H - s \rightarrow CH_3 - s + s$                        | $r_{IN} = k_{IN} \theta_{CH_2-s} \theta_{H-s}$                                          |
| 4      | $CH_3 - s + H - s \rightarrow CH_4 + 2s$                           | $r_{CH_4} = k_{CH_4} \theta_{CH_3-s} \theta_{H-s}$                                      |
| 5      | $C_n H_{2n+1} - s + CH_2 - s \rightarrow C_{n+1} H_{2n+3} - s + s$ | $r_{G,n} = k_G \cdot \theta_{C_n H_{2n+1}-s} \theta_{CH_2-s}$                           |
| 6      | $C_n H_{2n+1} - s + H - s \rightarrow C_n H_{2n+2} + 2s$           | $r_{P,n} = k_{Pn} \cdot \theta_{C_n H_{2n+1}-s} \theta_{H-s}$                           |
| 7      | $C_n H_{2n+1} - s \leftrightarrow C_n H_{2n} + H - s$              | $r_{O,n} = k_{O_n,dx} \theta_{C_n H_{2n+1}-s} - k_{O_n,sx} x_{C_n H_{2n}} \theta_{H-s}$ |
| 8      | $C_2 H_5 - s \leftrightarrow C_2 H_4 + H - s$                      | $r_{O,2} = k_{O_2,dx} \theta_{C_2 H_5-s} - k_{O_2,sx} x_{C_2 H_4} \theta_{H-s}$         |

119 Where  $P_n$  and  $O_n$  are the linear paraffin and  $\alpha$ -olefin with  $n$  carbon atoms,  
 120 respectively,  $\theta$  is the fraction of free catalytic sites and  $x_{O_n}$  is the molar fraction of the  
 121  $\alpha$ -olefin with  $n$  carbon atoms in the liquid phase surrounding the catalyst pellets.

122 In the given mechanism,  $H_2$  is irreversibly split at the active site ( $s$ ), and only the rate  
 123 equation for this reaction is expressed in the model using a power law expression. CO  
 124 is first adsorbed at the active site and then directly dissociated, assuming that step (2a)  
 125 is a rate-determining in the sequence of consecutive non-reversible steps (2a~f). The  
 126 rate constants for chain growth (step 5) and chain termination (step 6 and step 7) are  
 127 independent of the carbon number. To describe the experimental deviations of methane  
 128 and ethylene, the rate constants in step 4 and step 8 were treated separately.

### 129 S1.6 Dual-mechanism in Fig. 1b6

130 This model is proposed based on the hypothesis that two incompatible mechanisms  
 131 are involved resting exclusively on methylene (Fig. S1-2) and on carbon monoxide



132 insertion(Fig. S1-3), respectively. Each mechanism individually conforms to the linear  
 133 relationship of the Schulz-Flory model, and the product distribution in the experiment  
 134 is a superposition of the two mechanisms [7].

135 In the dual-mechanism model, the molar fraction ( $x_i$ ) of the product is expressed as

$$136 \quad \frac{x_i}{1 - x_1^{\text{exp}} - x_2^{\text{exp}}} = \frac{\alpha_1^{i-1} + \left(\frac{\alpha_1}{\alpha_2}\right)^{\xi-1} \alpha_2^{i-1}}{\frac{\alpha_1^2}{1 - \alpha_1} + \left(\frac{\alpha_1}{\alpha_2}\right)^{\xi-1} \frac{\alpha_2^2}{1 - \alpha_2}} \quad (\text{S1.27})$$

137 Where,  $x_1^{\text{exp}}$  and  $x_2^{\text{exp}}$  are the molar fractions of methane and ethylene.  $\alpha_1$  and  $\alpha_2$  are  
 138 chain growth probability factors,  $\xi$  is the intersection point of the two product  
 139 distributions, and these three parameters are evaluated by the least squares method.

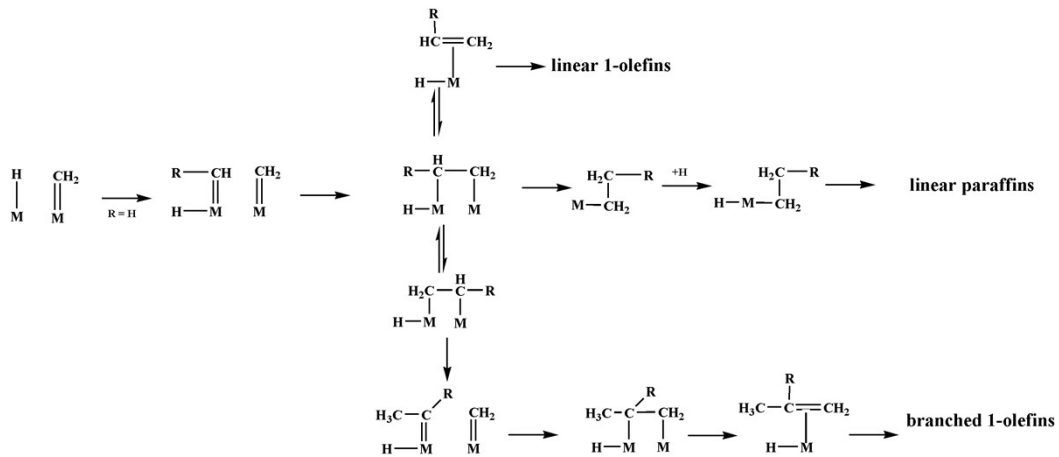

140

141 **Fig. S1-2 Mechanism 1: monomer CH<sub>2</sub>**

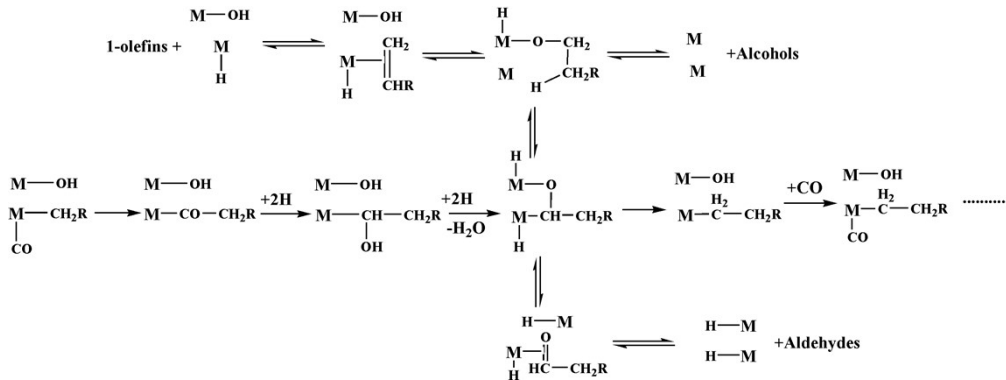

142

143 **Fig. S1-3 Mechanism 2: monomer CO**

144

145

146 **S1.7 Dual-mechanism in Fig. 1b7**

147 Fig. 1b7 uses vapour–liquid equilibrium (VLE) to explain the observed dual- $\alpha$   
148 product distribution in FTS. In their model, a single distribution is set up in the liquid  
149 phase, and the vapour is in equilibrium with the liquid [8].

150 The molar fraction of hydrocarbons with carbon number  $n$  in the gas phase ( $y_n$ ) and  
151 liquid phase ( $x_n$ ) can be expressed as,

152 
$$x_n = \alpha^{n-1}(1-\alpha)(1-c) \quad (\text{S1.28})$$

153 
$$y_n = K_n \alpha^{n-1}(1-\alpha)(1-c) \quad (\text{S1.29})$$

154 Where,  $\alpha$  is the chain growth factor, which is a constant independent of carbon  
155 number.  $K_n$  is the VLE constant, and  $c$  is the total molar fraction of the components in  
156 the liquid phase other than hydrocarbons. the total product distribution is described by

157 
$$\frac{z_{n+1}}{z_n} = \frac{x_{n+1}}{x_n} \frac{fK_{n+1} + (1-f)}{fK_{n+1} + (1-f)} = \alpha \frac{fK_{n+1} + (1-f)}{fK_n + (1-f)} \quad (\text{S1.30})$$

158  $z_n$  is the total mole fraction of hydrocarbon with carbon number  $n$ .  $f$  is the fraction of  
159 gas phase,  $f = \frac{V}{Z}$ .

160 For lighter hydrocarbons (small  $n$ ),  $K_n \gg 1$ ,

161 
$$\frac{z_{n+1}}{z_n} = \alpha \frac{K_{n+1}}{K_n} = \alpha\beta \quad (\text{S1.31})$$

162 For heavier hydrocarbons (large  $n$ ),  $K_n = 1$ ,

163 
$$\frac{z_{n+1}}{z_n} = \alpha \quad (\text{S1.32})$$

164 Thus the total product distribution for lighter hydrocarbons follows the vapour phase  
165 distribution where the slope is given by  $\log(\alpha\beta)$ . On the other hand, the total product

166 distribution for heavier hydrocarbons is consistent with the liquid phase product  
 167 distribution where the slope is given by  $\log(\alpha)$ . This clearly shows the observed  
 168 deviation from the single alpha Schulz-Flory distribution.

169 **S1.8 Multi-site in Fig. 1b8**

170 Fig 1b8 includes two-site model and distributed-site model. In two-site model the  
 171 molecular weight distribution of the products is described with a modification of the  
 172 Schulz-Flory distribution by including a second site, as shown in Eq. S1.33.

$$173 \quad m_n = x(1 - \alpha_1)\alpha_1^{n-1} + (1 - x)(1 - \alpha_2)\alpha_2^{n-1} \quad (S1.33)$$

174 Where  $m_n$  is the total moles of carbon number  $n$  relative to the total moles of organic  
 175 product,  $\alpha_1$  and  $\alpha_2$  are the chain growth probabilities for two active-sites, and  $x$  is the  
 176 mole fraction of organic product synthesized on site 1.

177 In the multi-site model, the molar fraction of substance with carbon number  $n$  is,

$$178 \quad m_n = \frac{\int_0^\infty F(X)(1 - \alpha(X))\alpha(X)^{n-1} dx}{\sum_{n=1}^\infty \int_0^\infty F(X)(1 - \alpha(X))\alpha(X)^{n-1} dx} \quad (S1.34)$$

179 This model introduces a dimensionless random variable  $X$  based on the Schulz-Flory  
 180 model and assumes that it is proportional to the concentration of potassium relative to  
 181 iron at a given point on the catalyst surface<sup>[9]</sup>. Postulating that potassium is normally  
 182 distributed on the catalyst surface, the fraction of sites with a potassium concentration  
 183  $X$ , is given by,

$$184 \quad F(X) = \frac{1}{\sqrt{2\pi}} \exp(X - X_{sm})^2 \quad (S1.35)$$

185 where  $X_{sm}$  is the potassium concentration of maximum probability.

186 The chain growth factor can be expressed as a function of  $X$ ,

187

$$\alpha(X) = 1 - (1 - \alpha_0) \exp(-bX) \quad (\text{S1.36})$$

188

where  $\alpha_0$  is the chain growth probability at  $X = 0$  (pure iron). The parameter  $b$

189

represents the strength of interaction between neighboring potassium and iron atoms.

190

As  $b$  approaches zero,  $\alpha$  approaches  $\alpha_0$  since at this limit the iron acts independently of

191

the potassium.

192

## 193 S2 The detailed flow diagrams of the reactors

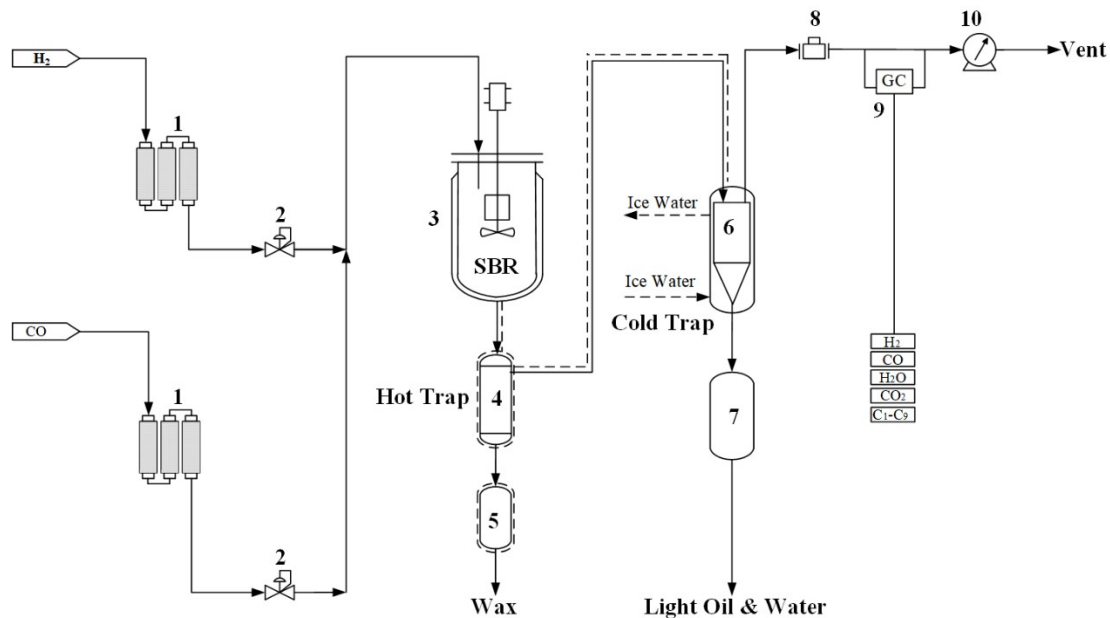

194

195

**Fig. S2-1** Flow scheme of the Spinning Basket Reactor

196

1. purification unit (de-sulphur, de-oxygen, de-carbonyl, de-water); 2. mass flow controller (Both

197

H<sub>2</sub> and CO); 3. Spinning Basket Reactor (SBR), 4. Hot trap; 5. Buff tank1(for wax); 6. Cold trap;

198

7. Buff tank2 (for light oil and water); 8. back pressure regulator; 9. Gas Chromatography (GC, for

199

tailgas); 10.wet flow meter.

200

The experimental process with SBR is shown in Fig. S2-1. After purification

201

(desulfurization, dehydration, decarbonylation), H<sub>2</sub> and CO are mixed at set flow rates

202

by mass flow controller, enter into the SBR and contact with the catalysts to undergo

203

FTS. The gas-liquid mixture of the reactor effluent is firstly separated by a hot trap to

204

obtain wax. The rest enters into a cold trap and cools to obtain the light oil and water.

205 After decompression, the non-condensable gas is analyzed online and then enters the  
 206 wet flow meter for flow measurement.

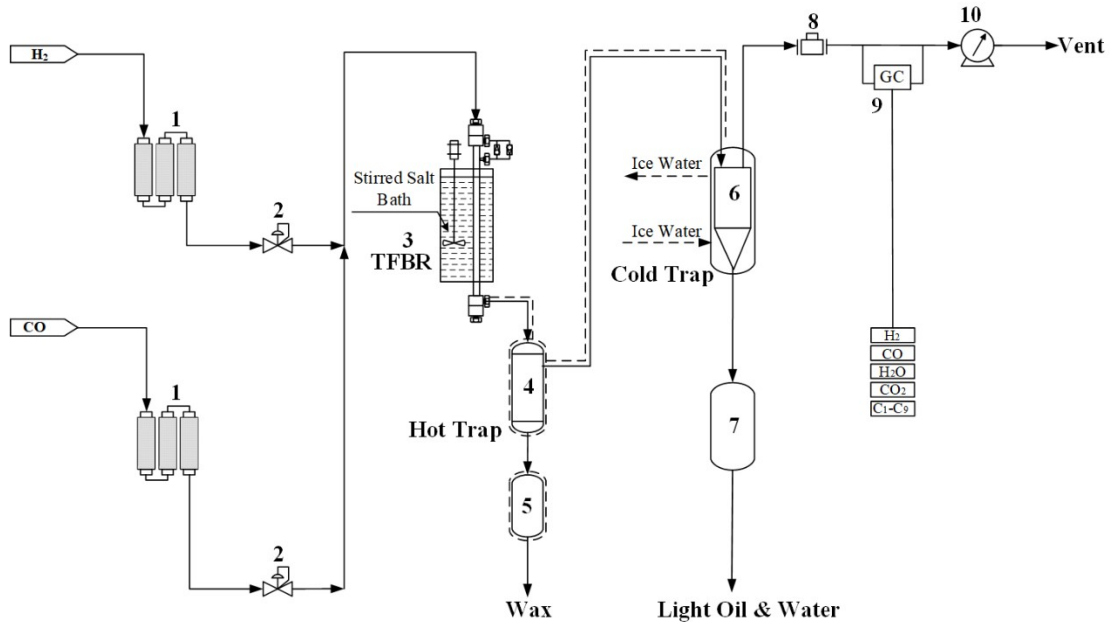

207

208

**Fig. S2-2** Flow scheme of the Tubular Fixed-Bed Reactor

209 1. purification unit (de-sulphur, de-oxygen, de-carbonyl, de-water); 2. mass flow controller (Both  
 210 H<sub>2</sub> and CO); 3. Tubular Fixed-Bed Reactor (TFBR), 4. Hot trap; 5. Buff tank1 (for wax); 6. Cold  
 211 trap; 7. Buff tank2 (for light oil and water); 8. back pressure regulator, 9. Gas Chromatography  
 212 (GC, for tail gas); 10. wet flow meter.

213 The flow scheme of the Tubular Fixed-Bed Reactor (TFBR) is similar to that of the

214 SBR, except for the reactor itself (Fig. S2-2).

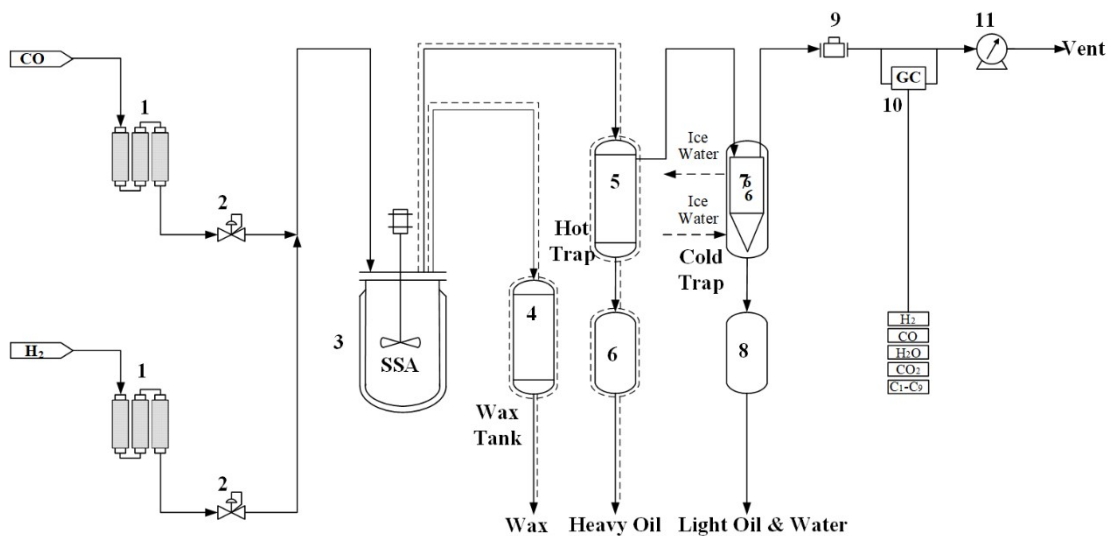

215

216

**Fig. S2-3** Flow scheme of the Stirred Slurry Autoclave

217 1. purification unit (de-sulphur, de-oxygen, de-carbonyl, de-water); 2. mass flow controller (Both  
 218 H<sub>2</sub> and CO); 3. Stirred Slurry Autoclave (SSA); 4. Wax Tank; 5. Hot trap; 6. Buff tank1 (for  
 219 heavy oil); 7. Cold trap; 8. Buff tank2 (for light oil and water); 9. back pressure regulator, 10. Gas  
 220 Chromatography (GC, for tailgas); 11. wet flow meter.

221 The product collection process in Stirred Slurry Autoclave (SSA) is different from  
 222 the above process in some extent (Fig. S2-3), e.g., the wax is collected through a Wax  
 223 Tank, and the remaining components enter into a hot trap to collect the heavy oil, and  
 224 then the rests enter into a cold trap to cool down and get light oil and water. After  
 225 decompression the non-condensable gas is analyzed online and then enters into a wet  
 226 flow meter for quantity measurement. Here, the heavy oil and light oils are normally  
 227 mixed together for analysis.

228

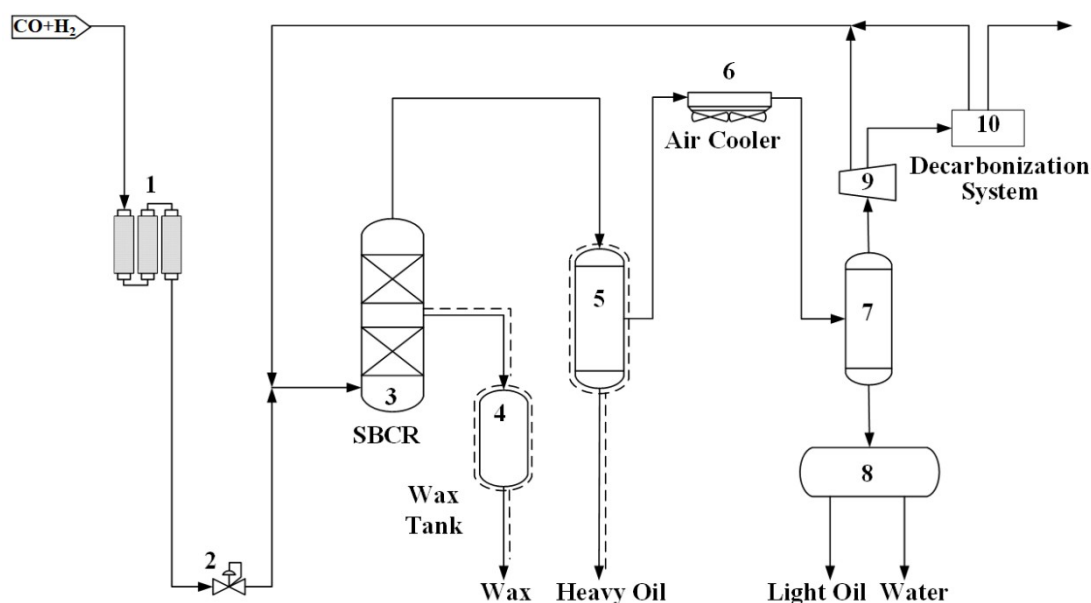

229

230 **Fig. S2-4** Flow scheme of the industrial Slurry Bubble Column Reactor

231 1. purification unit (de-sulphur, de-oxygen, de-carbonyl, de-water); 2. mass flow controller; 3.  
 232 Slurry Bubble Column Reactor (SBCR); 4. Wax Tank; 5. Gas-liquid separator1 (for heavy oil); 6.  
 233 Air Cooler; 7. Gas-liquid separator2 (for light oil and water); 8. Oil-water separator; 9.  
 234 Compressor; 10. Decarbonization system.

235 The process flow and product collection in the Slurry Bubble Column Reactor  
 236 (SBCR) are similar to that of the SSA process, as shown in Fig. S2-4. The purified  
 237 syngas(H<sub>2</sub>+CO) is injected into the SBCR, where it undergoes FTS upon contacting

238 with the catalyst. The produced liquid wax is collected in a wax tank, while the gas  
239 phase products at the top of the SBCR proceeds to gas-liquid separator 1 to obtain heavy  
240 oil. The remaining gas is cooled and then directed to gas-liquid separator 2, where light  
241 oil and water are obtained. Upon compression, the non-condensable gas enters the  
242 decarbonization system. After removing most of the CO<sub>2</sub>, a portion returns to the  
243 reactor, while the remainder enters the subsequent unit.

244

### 245 **S3 The detailed experimental process for data collection**

246 **Data collection in the Slurry Bubble Column Reactor (SBCR):** The SBCR is an  
247 industrial reactor located at Yitai Hangjinqi plant in China. Under normal  
248 circumstances, the reactor maintains long-term stable industrial operating conditions.  
249 The running results under this condition has undergone extensive duplicate validations.  
250 We collected 24-hour products for material balance checking, product analysis and data  
251 processing.

252 **Data collection in the Stirred Slurry Autoclave (SSA):** Experiments in SSA  
253 required additional liquid paraffins as an initial solvent for catalyst dispersion. After  
254 catalyst reduction and approximately 8 days of solvent replacement at the reaction  
255 conditions, no visually discernible solvent peaks were detected in collected oil and was  
256 samples. Subsequently, we maintained the reaction conditions for 24 hours and  
257 continuously analyzed the tail gas for steady-state confirmation, and then collected 12-  
258 hour products several times for material balance checking, product analysis and data  
259 processing.

260 **Data collection in the Tubular Fixed-Bed Reactor (TFBR):** The TFBR requires  
261 careful catalyst dilution and loading to ensure consistent repeatability across multiple  
262 experiments. After catalyst reduction and stability evaluation under the reaction  
263 conditions (by monitoring the repeatability of the tail gas composition) for 72 hours,  
264 then collected 12-hour products several times for material balance checking, product  
265 analysis and data processing.

266 **Data collection in the Spinning Basket Reactor (SBR):** The distribution behavior  
267 of FTS product under various reaction conditions was extensively investigated in the  
268 SBR reactor. When switching to a new experimental point, we maintained the reaction  
269 conditions for 24 hours and continuously analyzed the tail gas for steady-state  
270 confirmation, and then collected 12-hour products two times for material balance  
271 checking, product analysis and data processing. A standard point (275 °C, 3.0 MPa,  
272  $H_2/CO = 3$ , GHSV=3.5 NL/h/g-cat) was set to check whether the catalyst has undergone  
273 deactivation and requires replacement with a new catalyst. The standard point was  
274 repeated every 5 experimental points to do the evaluation.  
275

#### 276 **S4 The detailed calculation methodology for determining the overall** 277 **product distribution**

278 The Fischer-Tropsch synthesis products exhibit a broad boiling range, necessitating  
279 multi-stage cooling for their separation and collection. The effluent streams consist of  
280 the tail gas, oil, wax and aqueous products. The total mass of the hydrocarbon and  
281 oxygenate products is defined



282 
$$M_{total} = M_{gas} + M_{oil} + M_{wax} + M_{aqueous} \quad (S4.1)$$

283 in which  $M_{gas}$  is the mass of the hydrocarbon products in the tail gas stream,  $M_{aqueous}$  is  
 284 the mass of the oxygenates in the aqueous phase.

285 The mass of each component in a stream is defined by  $M_{n,stream}^i$ , where *stream*  
 286 represents tail gas, oil, wax or aqueous stream, *i* is the type of a component, e.g., olefin,  
 287 paraffin, alcohol, acid, aldehyde, ketone and ester, *n* is the carbon number of the  
 288 component.

289 The mass of a component in the tail gas is quantified by 1D GC

290 
$$M_{n,gas}^i = \frac{f_{n,gas,1D}^i * A_{n,gas,1D}^i}{\sum f_{n,gas,1D}^i * A_{n,gas,1D}^i} \frac{V_{gas}}{22.4} * m_n^i \quad (S4.2)$$

291 where,  $f_{n,gas,1D}^i$  and  $A_{n,gas,1D}^i$  are the molar response factor and peak area of a gas  
 292 component with type *i* and carbon number *n* characterized in 1D GC, respectively.  
 293  $V_{gas}$  is the volume flow rate of the tail gas at standard conditions,  $m_n^i$  is the molecular  
 294 weight of the component with type *i* and carbon number *n*.

295 The oil is analyzed by both 1D GC and 2D GC×GC. The 1D GC is responsible for  
 296 quantifying components with carbon number  $\leq 7$ , while the 2D GC×GC quantifying  
 297 the rest parts. The 1D GC and 2D GC×GC results are correlated by using C10 paraffin  
 298 as an internal standard

299 
$$f_{n,oil,2D}^i * A_{n,oil,2D}^i = \frac{f_{10,2D}^{paraffin} * A_{10,2D}^{paraffin}}{f_{10,1D}^{paraffin} * A_{10,1D}^{paraffin}} * f_{n,oil,1D}^i * A_{n,oil,1D}^i \quad n \leq 7 \quad (S4.3)$$

300 where  $f_{n,oil,1D}^i$  and  $f_{n,oil,2D}^i$  are the mass response factors of an oil component with type  
 301 *i* and carbon number *n* characterized in 1D GC and 2D GC×GC, respectively.

302  $A_{n,oil,1D}^i$  and  $A_{n,oil,2D}^i$  are the peak areas of the corresponding component in 1D GC and

303 2D GC×GC, respectively. C10 paraffin is the internal standard. Therefore, the mass  
 304 of a component in the oil could be calculated

$$305 \quad M_{n,oil}^i = \frac{f_{n,oil,2D}^i * A_{n,oil,2D}^i}{\sum f_{n,oil,2D}^i * A_{n,oil,2D}^i} M_{oil} \quad (S4.4)$$

306 The components with carbon number  $\leq 30$  in wax are quantified by 2D GC×GC,

$$307 \quad M_{n,wax}^i = \frac{f_{n,wax,2D}^i * A_{n,wax,2D}^i}{\sum f_{n,wax,2D}^i * A_{n,wax,2D}^i} M_{wax} * RM_{30} \quad n \leq 30 \quad (S4.5)$$

308 where  $f_{n,wax,2D}^i$  and  $A_{n,wax,2D}^i$  are the mass response factor and peak area of a wax  
 309 component with type  $i$  and carbon number  $n$  characterized in 2D GC×GC, respectively.

310  $RM_{30}$  is the recovered mass% of wax components at C30.

311 The components with carbon number  $> 30$  in wax are quantified by high temperature  
 312 simulated distillation (HTSD) which could provide the mass information of each carbon  
 313 number.

$$314 \quad M_{n,wax} = \frac{f_{n,wax,HTSD} * A_{n,wax,HTSD}}{\sum f_{n,wax,HTSD} * A_{n,wax,HTSD}} M_{wax} * (RM_{100} - RM_{30}) \quad 30 < n \leq 100 \quad (S4.6)$$

315 where  $f_{n,wax,HTSD}$  and  $A_{n,wax,HTSD}$  are the mass response factors and peak area of a wax  
 316 component with carbon number  $n$  characterized in HTSD, respectively.  $RM_{100}$  is the  
 317 recovered mass% of wax components at C100.

318 Subsequently, the mass fractions of paraffins and olefins with carbon number  $\leq 30$   
 319 and the mass fractions of the total hydrocarbons with carbon number  $\leq 100$  can be  
 320 calculated, thereby obtaining the related product distribution curve

$$321 \quad W_n^{paraffin} = \frac{M_{n,gas}^{paraffin} + M_{n,oil}^{paraffin} + M_{n,wax}^{paraffin}}{M_{total}} \quad 1 \leq n \leq 30 \quad (S4.7)$$

$$322 \quad W_n^{olefin} = \frac{M_{n,gas}^{olefin} + M_{n,oil}^{olefin} + M_{n,wax}^{olefin}}{M_{total}} \quad 2 \leq n \leq 30 \quad (S4.8)$$

323 
$$W_n = W_n^{olefin} + W_n^{paraffin} \quad 1 \leq n \leq 30 \quad (S4.9)$$

324 
$$W_n = \frac{M_{n,wax}}{M_{total}} \quad 30 < n \leq 100 \quad (S4.10)$$

325 where  $W_n^{paraffin}$ ,  $W_n^{olefin}$  and  $W_n$  are mass fractions of a paraffin, olefin and total  
 326 hydrocarbon with carbon number  $n$ .

327 HTSD can only provide the mass of each carbon number, but our previous results  
 328 show that C30+ wax consists almost entirely of paraffins, with very few amounts of  
 329 olefins, and the oxygenates are negligible. To be accurate, we can estimate the olefin  
 330 distribution in C30+ wax by extrapolating the known distribution of C15-C30 olefin,  
 331 then obtain the paraffin distribution with carbon number  $30 < n \leq 100$  by subtracting  
 332 the olefin distribution from the carbon number distribution

333 
$$W_n^{olefin} = n e^{b_o} (\alpha_o)^n \quad 30 < n \leq 100 \quad (S4.11)$$

334 
$$W_n^{paraffin} = W_n - W_n^{olefin} \quad 30 < n \leq 100 \quad (S4.12)$$

335 where  $\alpha_o$  and  $b_o$  could be estimated from the known carbon number distribution of  
 336 olefin.

337 According to extensive experimental data, we observed that the chain growth factor  
 338 at the high-carbon-number range remained approximately invariant with carbon  
 339 number. Therefore, the unrecovered section of wax could reasonably be complemented  
 340 by extrapolating the known total hydrocarbon distribution curve

341 
$$W_n = n e^b \alpha^n \quad 100 < n \leq N \quad (S4.13)$$

342 where  $\alpha$  and  $b$  could be estimated from the known total hydrocarbon distribution.  $N$  is  
 343 the maximum carbon number to be extrapolated and it is determined by the following  
 344 constraints

345 
$$1 - \frac{RM_{100}}{100} - \sum_{n=101}^N \frac{W_n M_{total}}{M_{wax}} \leq 0.001 \quad (S4.14)$$

346 which means the content of each carbon number in the unrecovered wax is extrapolated  
 347 according to equation (S4.13) until the extrapolation reaches a carbon number  $N$  where  
 348 the unrecovered mass is less than 0.1%.

349 The above constraints originate from the following two equations

350 
$$W_{n,wax} = W_n \frac{M_{total}}{M_{wax}} \quad 100 < n \leq N \quad (S4.15)$$

351 
$$1 - \frac{RM_{100}}{100} = \sum_{n=101}^N W_{n,wax} = \sum_{n=101}^N \frac{W_n M_{total}}{M_{wax}} \quad (S4.16)$$

352 **S5 Operating conditions and results**

353 The operating conditions and results mentioned in Fig. 2 to Fig. 4 are shown in Table S5-1.

354 **Table S5-1** Reaction conditions and experimental results

| No     | T<br>K | P<br>Mpa | inlet H <sub>2</sub> /CO<br>-- | inlet GHSV<br>NL/g-cat/h | outlet GHSV<br>NL/g-cat/h | xCO<br>% | xH <sub>2</sub><br>% | Selectivity(C-atom%) |                                |                  |
|--------|--------|----------|--------------------------------|--------------------------|---------------------------|----------|----------------------|----------------------|--------------------------------|------------------|
|        |        |          |                                |                          |                           |          |                      | CH <sub>4</sub>      | C <sub>2</sub> ~C <sub>4</sub> | C <sub>5</sub> + |
| R-1    | 273    | 2.92     | 2.88                           | 19.40                    | --                        | 63.83    | 25                   | 2.55                 | 4.31                           | 74.21            |
| R-2    | 275    | 3.01     | 3.00                           | 10.00                    | 7.49                      | 74.67    | 28.79                | 4.33                 | 10.34                          | 56.42            |
| R-3    | 275    | 3.00     | 3.01                           | 10.00                    | 7.74                      | 61.4     | 25.8                 | 3.09                 | 9.91                           | 58.56            |
| R-4*   | 275    | 3.00     | 2.99                           | 10.01                    | 7.64                      | 64.7     | 27.26                | 6.94                 | 8.91                           | 46.22            |
| HC-1   | 275    | 3.01     | 1.00                           | 35.01                    | 29.43                     | 25.41    | 25.49                | 1.14                 | 5.33                           | 57.14            |
| HC-2   | 275    | 3.03     | 2.00                           | 35.00                    | 29.61                     | 35.43    | 19.23                | 1.97                 | 6.77                           | 58.03            |
| HC-4   | 275    | 3.03     | 4.00                           | 34.99                    | 30.63                     | 49.11    | 14.16                | 3.44                 | 6.75                           | 65.25            |
| HC-5   | 275    | 3.03     | 5.00                           | 34.99                    | 30.48                     | 58.88    | 13.81                | 4.49                 | 7.19                           | 60.62            |
| SV-10* | 275    | 3.00     | 2.99                           | 10.01                    | 7.64                      | 64.7     | 27.26                | 6.94                 | 8.91                           | 46.22            |
| SV-25  | 275    | 3.00     | 3.00                           | 25.00                    | 21.22                     | 44.42    | 17.36                | 6.16                 | 10.32                          | 49.39            |
| SV-60  | 275    | 3.03     | 3.00                           | 60.00                    | 54.19                     | 32.24    | 11.17                | 4.1                  | 13.33                          | 54.37            |
| T-265  | 265    | 3.00     | 3.00                           | 35.00                    | 28.99                     | 44.69    | 20.56                | 2.06                 | 6.81                           | 63.79            |
| T-275  | 275    | 3.03     | 3.00                           | 35.00                    | 29.49                     | 47.78    | 18.09                | 2.34                 | 6.08                           | 63.12            |
| T-285  | 285    | 3.00     | 3.00                           | 35.00                    | 28.73                     | 50.65    | 22.02                | 2.76                 | 6.52                           | 67.72            |
| T-295  | 295    | 3.00     | 3.00                           | 35.00                    | 28.83                     | 53.27    | 21.08                | 3.18                 | 6.76                           | 61.31            |

355 Note: R-4 and SV-10 are the same experimental point.

356

357 The original experimental data in the manuscript are shown in Table S5-2~S5-5, including total hydrocarbons, olefins and paraffins and their  
 358 extrapolations.

359 **Table S5-2** The detailed data of the total hydrocarbon distribution in Fig. 2c, Fig. 4a1-Fig. 4d1

| C  | R1     | R2     | R3     | R4     | HC-1   | HC-2   | HC-4   | HC-5   | SV-10  | SV-25  | SV-60  | T-265  | T-275  | T-285  | T-295  |
|----|--------|--------|--------|--------|--------|--------|--------|--------|--------|--------|--------|--------|--------|--------|--------|
| 1  | -3.234 | -2.745 | -3.073 | -2.168 | -3.926 | -3.439 | -3.003 | -2.696 | -2.168 | -2.337 | -2.736 | -3.475 | -3.331 | -3.266 | -3.030 |
| 2  | -5.014 | -4.084 | -4.307 | -3.841 | -4.561 | -4.396 | -4.764 | -4.695 | -3.841 | -3.758 | -4.071 | -4.516 | -4.692 | -4.873 | -4.690 |
| 3  | -4.635 | -3.966 | -4.086 | -4.119 | -4.534 | -4.331 | -4.507 | -4.400 | -4.119 | -3.987 | -4.083 | -4.407 | -4.518 | -4.581 | -4.455 |
| 4  | -4.934 | -4.371 | -4.267 | -4.490 | -4.936 | -4.748 | -4.644 | -4.510 | -4.490 | -4.468 | -4.511 | -4.786 | -4.786 | -4.704 | -4.581 |
| 5  | -5.202 | -4.760 | -4.484 | -4.722 | -5.293 | -5.128 | -4.817 | -4.675 | -4.722 | -4.788 | -4.869 | -5.154 | -5.054 | -4.871 | -4.754 |
| 6  | -5.280 | -5.067 | -4.699 | -4.941 | -5.598 | -5.383 | -5.044 | -4.883 | -4.941 | -5.007 | -5.183 | -5.494 | -5.253 | -5.049 | -4.940 |
| 7  | -5.297 | -5.298 | -4.901 | -5.112 | -5.962 | -5.758 | -5.219 | -5.042 | -5.112 | -5.167 | -5.431 | -5.763 | -5.385 | -5.172 | -5.091 |
| 8  | -5.388 | -5.505 | -5.077 | -5.281 | -6.128 | -5.901 | -5.350 | -5.168 | -5.281 | -5.316 | -5.597 | -5.911 | -5.505 | -5.285 | -5.217 |
| 9  | -5.516 | -5.683 | -5.259 | -5.438 | -6.286 | -6.062 | -5.498 | -5.326 | -5.438 | -5.479 | -5.758 | -6.060 | -5.641 | -5.428 | -5.377 |
| 10 | -5.656 | -5.851 | -5.445 | -5.617 | -6.416 | -6.190 | -5.631 | -5.478 | -5.617 | -5.645 | -5.882 | -6.166 | -5.774 | -5.563 | -5.513 |
| 11 | -5.816 | -6.025 | -5.624 | -5.783 | -6.559 | -6.319 | -5.774 | -5.637 | -5.783 | -5.803 | -6.011 | -6.296 | -5.905 | -5.691 | -5.665 |
| 12 | -5.980 | -6.181 | -5.809 | -5.941 | -6.684 | -6.444 | -5.923 | -5.800 | -5.941 | -5.964 | -6.144 | -6.399 | -6.040 | -5.824 | -5.823 |
| 13 | -6.132 | -6.351 | -6.008 | -6.107 | -6.793 | -6.564 | -6.072 | -5.963 | -6.107 | -6.153 | -6.273 | -6.522 | -6.178 | -5.970 | -5.993 |
| 14 | -6.247 | -6.473 | -6.185 | -6.239 | -6.900 | -6.669 | -6.224 | -6.121 | -6.239 | -6.325 | -6.388 | -6.616 | -6.295 | -6.096 | -6.151 |
| 15 | -6.355 | -6.595 | -6.365 | -6.372 | -6.984 | -6.766 | -6.359 | -6.275 | -6.372 | -6.525 | -6.490 | -6.701 | -6.406 | -6.218 | -6.312 |
| 16 | -6.455 | -6.700 | -6.529 | -6.499 | -7.074 | -6.854 | -6.480 | -6.400 | -6.499 | -6.714 | -6.607 | -6.780 | -6.503 | -6.339 | -6.466 |
| 17 | -6.540 | -6.803 | -6.677 | -6.616 | -7.173 | -6.918 | -6.585 | -6.523 | -6.616 | -6.880 | -6.711 | -6.851 | -6.589 | -6.456 | -6.605 |
| 18 | -6.641 | -6.900 | -6.803 | -6.742 | -7.232 | -6.982 | -6.695 | -6.647 | -6.742 | -7.025 | -6.807 | -6.940 | -6.678 | -6.579 | -6.725 |
| 19 | -6.762 | -6.975 | -6.898 | -6.844 | -7.288 | -7.076 | -6.805 | -6.770 | -6.844 | -7.115 | -6.875 | -7.017 | -6.736 | -6.677 | -6.829 |
| 20 | -6.861 | -7.083 | -7.050 | -7.018 | -7.344 | -7.129 | -6.910 | -6.930 | -7.018 | -7.259 | -6.982 | -7.048 | -6.833 | -6.803 | -6.917 |

|    |        |        |         |         |        |        |        |        |         |        |        |        |        |        |        |
|----|--------|--------|---------|---------|--------|--------|--------|--------|---------|--------|--------|--------|--------|--------|--------|
| 21 | -6.983 | -7.172 | -7.140  | -7.192  | -7.362 | -7.152 | -6.994 | -6.991 | -7.192  | -7.370 | -7.069 | -7.123 | -6.907 | -6.917 | -7.005 |
| 22 | -7.107 | -7.261 | -7.273  | -7.386  | -7.413 | -7.222 | -7.096 | -7.126 | -7.386  | -7.465 | -7.159 | -7.175 | -6.988 | -7.029 | -7.091 |
| 23 | -7.220 | -7.354 | -7.404  | -7.576  | -7.458 | -7.288 | -7.224 | -7.282 | -7.576  | -7.553 | -7.252 | -7.222 | -7.072 | -7.138 | -7.183 |
| 24 | -7.327 | -7.448 | -7.578  | -7.746  | -7.522 | -7.347 | -7.328 | -7.373 | -7.746  | -7.642 | -7.334 | -7.275 | -7.151 | -7.255 | -7.279 |
| 25 | -7.433 | -7.542 | -7.693  | -7.922  | -7.551 | -7.404 | -7.442 | -7.480 | -7.922  | -7.727 | -7.420 | -7.331 | -7.251 | -7.361 | -7.377 |
| 26 | -7.529 | -7.637 | -7.948  | -8.083  | -7.609 | -7.511 | -7.544 | -7.628 | -8.083  | -7.837 | -7.509 | -7.388 | -7.340 | -7.469 | -7.481 |
| 27 | -7.624 | -7.741 | -8.111  | -8.231  | -7.663 | -7.572 | -7.623 | -7.708 | -8.231  | -7.945 | -7.596 | -7.450 | -7.427 | -7.530 | -7.589 |
| 28 | -7.714 | -7.843 | -8.251  | -8.369  | -7.722 | -7.652 | -7.699 | -7.805 | -8.369  | -8.052 | -7.686 | -7.517 | -7.516 | -7.698 | -7.704 |
| 29 | -7.804 | -7.943 | -8.381  | -8.503  | -7.781 | -7.709 | -7.790 | -7.936 | -8.503  | -8.164 | -7.776 | -7.585 | -7.603 | -7.810 | -7.817 |
| 30 | -7.880 | -8.042 | -8.518  | -8.638  | -7.833 | -7.780 | -7.912 | -8.023 | -8.638  | -8.277 | -7.868 | -7.651 | -7.691 | -7.915 | -7.934 |
| 31 | -7.982 | -8.143 | -8.643  | -8.789  | -7.857 | -7.799 | -8.008 | -8.209 | -8.789  | -8.400 | -7.973 | -7.723 | -7.783 | -8.026 | -8.054 |
| 32 | -8.063 | -8.231 | -8.765  | -8.924  | -7.909 | -7.868 | -8.109 | -8.322 | -8.924  | -8.512 | -8.062 | -7.787 | -7.870 | -8.129 | -8.168 |
| 33 | -8.135 | -8.319 | -8.894  | -9.063  | -7.963 | -7.937 | -8.208 | -8.436 | -9.063  | -8.622 | -8.150 | -7.848 | -7.953 | -8.231 | -8.282 |
| 34 | -8.201 | -8.409 | -9.020  | -9.208  | -8.017 | -8.006 | -8.309 | -8.547 | -9.208  | -8.732 | -8.237 | -7.913 | -8.040 | -8.332 | -8.398 |
| 35 | -8.259 | -8.498 | -9.139  | -9.353  | -8.073 | -8.076 | -8.409 | -8.659 | -9.353  | -8.836 | -8.324 | -7.978 | -8.124 | -8.434 | -8.512 |
| 36 | -8.328 | -8.587 | -9.290  | -9.498  | -8.127 | -8.144 | -8.510 | -8.774 | -9.498  | -8.944 | -8.409 | -8.043 | -8.205 | -8.536 | -8.622 |
| 37 | -8.386 | -8.672 | -9.345  | -9.640  | -8.183 | -8.212 | -8.608 | -8.887 | -9.640  | -9.048 | -8.495 | -8.108 | -8.291 | -8.624 | -8.737 |
| 38 | -8.465 | -8.763 | -9.433  | -9.783  | -8.236 | -8.281 | -8.707 | -8.998 | -9.783  | -9.153 | -8.579 | -8.173 | -8.374 | -8.724 | -8.840 |
| 39 | -8.525 | -8.847 | -9.524  | -9.921  | -8.289 | -8.346 | -8.806 | -9.110 | -9.921  | -9.257 | -8.664 | -8.234 | -8.458 | -8.815 | -8.947 |
| 40 | -8.580 | -8.935 | -9.630  | -10.059 | -8.342 | -8.411 | -8.903 | -9.218 | -10.059 | -9.361 | -8.746 | -8.296 | -8.545 | -8.908 | -9.047 |
| 41 | -8.637 | -9.017 | -9.765  | -10.206 | -8.393 | -8.476 | -8.997 | -9.328 | -10.206 | -9.469 | -8.829 | -8.359 | -8.625 | -8.995 | -9.148 |
| 42 | -8.694 | -9.102 | -9.908  | -10.348 | -8.446 | -8.537 | -9.093 | -9.435 | -10.348 | -9.574 | -8.912 | -8.418 | -8.708 | -9.086 | -9.241 |
| 43 | -8.773 | -9.183 | -10.044 | -10.490 | -8.501 | -8.602 | -9.186 | -9.542 | -10.490 | -9.679 | -8.994 | -8.483 | -8.792 | -9.175 | -9.338 |
| 44 | -8.841 | -9.263 | -10.179 | -10.632 | -8.554 | -8.665 | -9.278 | -9.647 | -10.632 | -9.782 | -9.081 | -8.546 | -8.876 | -9.263 | -9.432 |
| 45 | -8.915 | -9.347 | -10.304 | -10.775 | -8.610 | -8.728 | -9.372 | -9.755 | -10.775 | -9.885 | -9.170 | -8.615 | -8.960 | -9.358 | -9.527 |
| 46 | -8.992 | -9.429 | -10.419 | -10.917 | -8.667 | -8.793 | -9.463 | -9.858 | -10.917 | -9.984 | -9.262 | -8.685 | -9.048 | -9.449 | -9.619 |

|    |         |         |         |         |         |         |         |         |         |         |         |         |         |         |         |
|----|---------|---------|---------|---------|---------|---------|---------|---------|---------|---------|---------|---------|---------|---------|---------|
| 47 | -9.053  | -9.511  | -10.513 | -11.059 | -8.727  | -8.863  | -9.553  | -9.966  | -11.059 | -10.084 | -9.359  | -8.757  | -9.135  | -9.545  | -9.715  |
| 48 | -9.130  | -9.594  | -10.619 | -11.201 | -8.789  | -8.929  | -9.645  | -10.071 | -11.201 | -10.186 | -9.456  | -8.832  | -9.231  | -9.639  | -9.809  |
| 49 | -9.191  | -9.679  | -10.733 | -11.343 | -8.857  | -9.002  | -9.738  | -10.177 | -11.343 | -10.288 | -9.556  | -8.908  | -9.325  | -9.734  | -9.909  |
| 50 | -9.257  | -9.766  | -10.918 | -11.486 | -8.921  | -9.070  | -9.831  | -10.286 | -11.486 | -10.395 | -9.658  | -8.983  | -9.422  | -9.836  | -10.013 |
| 51 | -9.317  | -9.846  | -10.975 | -11.628 | -8.983  | -9.144  | -9.921  | -10.393 | -11.628 | -10.499 | -9.756  | -9.055  | -9.518  | -9.921  | -10.105 |
| 52 | -9.370  | -9.926  | -11.053 | -11.770 | -9.049  | -9.214  | -10.017 | -10.500 | -11.770 | -10.610 | -9.857  | -9.128  | -9.618  | -10.026 | -10.210 |
| 53 | -9.429  | -10.013 | -11.169 | -11.912 | -9.107  | -9.289  | -10.107 | -10.606 | -11.912 | -10.719 | -9.958  | -9.197  | -9.714  | -10.116 | -10.307 |
| 54 | -9.485  | -10.091 | -11.262 | -12.054 | -9.164  | -9.358  | -10.202 | -10.716 | -12.054 | -10.833 | -10.052 | -9.269  | -9.813  | -10.206 | -10.411 |
| 55 | -9.527  | -10.172 | -11.402 | -12.196 | -9.226  | -9.435  | -10.290 | -10.826 | -12.196 | -10.947 | -10.150 | -9.341  | -9.912  | -10.305 | -10.511 |
| 56 | -9.577  | -10.263 | -11.492 | -12.339 | -9.287  | -9.502  | -10.387 | -10.932 | -12.339 | -11.057 | -10.244 | -9.404  | -10.003 | -10.400 | -10.605 |
| 57 | -9.632  | -10.321 | -11.606 | -12.481 | -9.337  | -9.571  | -10.475 | -11.042 | -12.481 | -11.170 | -10.338 | -9.475  | -10.102 | -10.483 | -10.697 |
| 58 | -9.666  | -10.414 | -11.688 | -12.623 | -9.393  | -9.643  | -10.564 | -11.152 | -12.623 | -11.280 | -10.432 | -9.534  | -10.192 | -10.577 | -10.797 |
| 59 | -9.725  | -10.478 | -11.782 | -12.765 | -9.437  | -9.705  | -10.660 | -11.257 | -12.765 | -11.392 | -10.519 | -9.605  | -10.286 | -10.668 | -10.890 |
| 60 | -9.754  | -10.559 | -11.867 | -12.907 | -9.496  | -9.779  | -10.751 | -11.365 | -12.907 | -11.506 | -10.606 | -9.662  | -10.375 | -10.755 | -10.979 |
| 61 | -9.814  | -10.625 | -11.953 | -13.050 | -9.548  | -9.849  | -10.841 | -11.471 | -13.050 | -11.613 | -10.695 | -9.725  | -10.459 | -10.831 | -11.072 |
| 62 | -9.860  | -10.710 | -12.148 | -13.192 | -9.577  | -9.910  | -10.935 | -11.579 | -13.192 | -11.722 | -10.781 | -9.786  | -10.556 | -10.943 | -11.166 |
| 63 | -9.868  | -10.757 | -12.259 | -13.334 | -9.641  | -9.971  | -11.020 | -11.684 | -13.334 | -11.834 | -10.860 | -9.856  | -10.641 | -11.045 | -11.253 |
| 64 | -9.930  | -10.839 | -12.370 | -13.476 | -9.680  | -10.030 | -11.109 | -11.792 | -13.476 | -11.940 | -10.946 | -9.906  | -10.727 | -11.136 | -11.354 |
| 65 | -9.996  | -10.907 | -12.481 | -13.618 | -9.732  | -10.082 | -11.201 | -11.891 | -13.618 | -12.047 | -11.025 | -9.962  | -10.793 | -11.172 | -11.418 |
| 66 | -10.002 | -10.971 | -12.592 | -13.760 | -9.787  | -10.153 | -11.280 | -11.998 | -13.760 | -12.162 | -11.107 | -10.039 | -10.896 | -11.322 | -11.543 |
| 67 | -10.057 | -11.019 | -12.703 | -13.903 | -9.839  | -10.212 | -11.378 | -12.105 | -13.903 | -12.266 | -11.185 | -10.072 | -10.964 | -11.375 | -11.617 |
| 68 | -10.105 | -11.110 | -12.814 | -14.045 | -9.889  | -10.281 | -11.454 | -12.202 | -14.045 | -12.377 | -11.264 | -10.131 | -11.056 | -11.500 | -11.715 |
| 69 | -10.112 | -11.151 | -12.925 | -14.187 | -9.924  | -10.308 | -11.545 | -12.311 | -14.187 | -12.490 | -11.334 | -10.198 | -11.135 | -11.589 | -11.794 |
| 70 | -10.172 | -11.232 | -13.035 | -14.329 | -9.981  | -10.408 | -11.639 | -12.408 | -14.329 | -12.604 | -11.421 | -10.236 | -11.207 | -11.633 | -11.896 |
| 71 | -10.201 | -11.255 | -13.146 | -14.471 | -10.040 | -10.411 | -11.710 | -12.510 | -14.471 | -12.714 | -11.495 | -10.312 | -11.304 | -11.806 | -11.994 |
| 72 | -10.224 | -11.351 | -13.257 | -14.614 | -10.073 | -10.497 | -11.804 | -12.607 | -14.614 | -12.835 | -11.559 | -10.353 | -11.360 | -11.870 | -12.072 |



|    |         |         |         |         |         |         |         |         |         |         |         |         |         |         |         |
|----|---------|---------|---------|---------|---------|---------|---------|---------|---------|---------|---------|---------|---------|---------|---------|
| 73 | -10.283 | -11.406 | -13.368 | -14.756 | -10.133 | -10.539 | -11.877 | -12.722 | -14.756 | -12.948 | -11.642 | -10.401 | -11.440 | -11.946 | -12.206 |
| 74 | -10.299 | -11.446 | -13.479 | --      | -10.175 | -10.586 | -11.985 | -12.804 | --      | -13.064 | -11.716 | -10.488 | -11.531 | -12.046 | -12.273 |
| 75 | -10.344 | -11.534 | -13.590 | --      | -10.229 | -10.635 | -12.034 | -12.920 | --      | -13.191 | -11.786 | -10.508 | -11.617 | -12.183 | -12.394 |
| 76 | -10.341 | -11.546 | -13.701 | --      | -10.250 | -10.696 | -12.138 | -13.011 | --      | -13.323 | -11.864 | -10.571 | -11.669 | -12.314 | -12.501 |
| 77 | -10.396 | -11.619 | -13.812 | --      | -10.307 | -10.726 | -12.203 | -13.132 | --      | -13.445 | -11.929 | -10.603 | -11.760 | -12.391 | -12.641 |
| 78 | -10.433 | -11.681 | -13.923 | --      | -10.360 | -10.789 | -12.306 | -13.235 | --      | -13.575 | -12.002 | -10.666 | -11.831 | -12.516 | -12.691 |
| 79 | -10.469 | -11.739 | -14.034 | --      | -10.424 | -10.844 | -12.348 | -13.328 | --      | -13.734 | -12.076 | -10.736 | -11.928 | -12.577 | -12.836 |
| 80 | -10.540 | -11.797 | -14.144 | --      | -10.465 | -10.899 | -12.470 | -13.405 | --      | -13.879 | -12.165 | -10.779 | -11.959 | -12.757 | -12.914 |
| 81 | -10.584 | -11.854 | -14.255 | --      | -10.491 | -10.953 | -12.520 | -13.516 | --      | -13.977 | -12.211 | -10.833 | -12.072 | -12.820 | -13.064 |
| 82 | -10.531 | -11.912 | -14.366 | --      | -10.535 | -11.008 | -12.631 | -13.617 | --      | -14.105 | -12.292 | -10.886 | -12.199 | -13.003 | --      |
| 83 | -10.587 | -11.969 | -14.477 | --      | -10.563 | -11.062 | -12.697 | -13.752 | --      | -14.234 | -12.358 | -10.939 | -12.221 | -13.087 | --      |
| 84 | -10.682 | -12.027 | -14.588 | --      | -10.591 | -11.117 | -12.745 | -13.788 | --      | -14.362 | -12.449 | -10.992 | -12.329 | -13.246 | --      |
| 85 | -10.709 | -12.084 | -14.699 | --      | -10.639 | -11.172 | -12.829 | -13.921 | --      | -14.490 | -12.507 | -11.045 | -12.365 | -13.310 | --      |
| 86 | -10.741 | -12.142 | -14.810 | --      | -10.671 | -11.226 | -12.875 | --      | --      | -14.619 | -12.578 | -11.098 | -12.396 | -13.494 | --      |
| 87 | -10.649 | -12.199 | -14.921 | --      | -10.710 | -11.281 | -13.012 | --      | --      | -14.747 | -12.659 | -11.151 | -12.506 | -13.724 | --      |
| 88 | -10.692 | -12.257 | -15.032 | --      | -10.737 | -11.335 | -13.141 | --      | --      | -14.876 | -12.711 | -11.204 | -12.627 | --      | --      |
| 89 | -10.700 | -12.315 | -15.143 | --      | -10.771 | -11.390 | --      | --      | --      | -15.004 | -12.800 | -11.257 | -12.734 | --      | --      |
| 90 | -10.769 | -12.372 | --      | --      | -10.813 | -11.445 | --      | --      | --      | -15.132 | -12.871 | -11.310 | -12.825 | --      | --      |
| 91 | -10.838 | -12.430 | --      | --      | -10.867 | -11.499 | --      | --      | --      | -15.261 | -12.933 | -11.364 | -12.977 | --      | --      |
| 92 | -10.874 | -12.487 | --      | --      | -10.903 | -11.554 | --      | --      | --      | -15.389 | -13.047 | -11.417 | --      | --      | --      |
| 93 | -10.789 | -12.545 | --      | --      | -10.936 | -11.608 | --      | --      | --      | -15.518 | -13.096 | -11.470 | --      | --      | --      |
| 94 | -10.901 | -12.602 | --      | --      | -10.966 | -11.663 | --      | --      | --      | -15.646 | -13.127 | -11.523 | --      | --      | --      |
| 95 | -10.901 | -12.660 | --      | --      | -11.034 | -11.718 | --      | --      | --      | --      | -13.272 | -11.576 | --      | --      | --      |
| 96 | -10.952 | -12.717 | --      | --      | -11.081 | -11.772 | --      | --      | --      | --      | -13.301 | -11.629 | --      | --      | --      |
| 97 | -10.955 | --      | --      | --      | -11.112 | -11.827 | --      | --      | --      | --      | -13.386 | -11.682 | --      | --      | --      |
| 98 | -11.013 | --      | --      | --      | -11.177 | -11.881 | --      | --      | --      | --      | -13.429 | -11.735 | --      | --      | --      |

|     |         |    |    |    |         |         |    |    |    |    |         |         |    |    |    |
|-----|---------|----|----|----|---------|---------|----|----|----|----|---------|---------|----|----|----|
| 99  | -11.026 | -- | -- | -- | -11.187 | -11.936 | -- | -- | -- | -- | -13.520 | -11.788 | -- | -- | -- |
| 100 | -11.038 | -- | -- | -- | -11.256 | -11.991 | -- | -- | -- | -- | -13.592 | -11.841 | -- | -- | -- |

360

361

**Table S5-3** Extrapolation of the total hydrocarbon distribution for C100+ components (Dashed lines in Fig. 2c)

| C number | value     | C number | value     | C number | value    | C number | value     |
|----------|-----------|----------|-----------|----------|----------|----------|-----------|
| 101      | -11.2632  | 117      | -11.81959 | 133      | -12.3760 | 149      | -12.93246 |
| 102      | -11.2979  | 118      | -11.85437 | 134      | -12.4108 | 150      | -12.96724 |
| 103      | -11.3327  | 119      | -11.88915 | 135      | -12.4456 | 151      | -13.00201 |
| 104      | -11.3675  | 120      | -11.92393 | 136      | -12.4804 | 152      | -13.03679 |
| 105      | -11.4023  | 121      | -11.9587  | 137      | -12.5151 | 153      | -13.07157 |
| 106      | -11.4370  | 122      | -11.99348 | 138      | -12.5499 | 154      | -13.10634 |
| 107      | -11.4718  | 123      | -12.02826 | 139      | -12.5847 | 155      | -13.14112 |
| 108      | -11.5066  | 124      | -12.06303 | 140      | -12.6195 | 156      | -13.1759  |
| 109      | -11.5414  | 125      | -12.09781 | 141      | -12.6542 | 157      | -13.21067 |
| 110      | -11.5762  | 126      | -12.13259 | 142      | -12.6890 | 158      | -13.24545 |
| 111      | -11.6109  | 127      | -12.16736 | 143      | -12.7238 | 159      | -13.28023 |
| 112      | -11.6457  | 128      | -12.20214 | 144      | -12.7586 | 160      | -13.31501 |
| 113      | -11.6805  | 129      | -12.23692 | 145      | -12.7934 | 161      | -13.34978 |
| 114      | -11.7153  | 130      | -12.2717  | 146      | -12.8281 | 162      | -13.38456 |
| 115      | -11.7500  | 131      | -12.30647 | 147      | -12.8629 | 163      | -13.41934 |
| 116      | -11.78482 | 132      | -12.34125 | 148      | -12.8977 | 164      | -13.45411 |

362

363

364

**Table S5-4** The detailed data of the olefin distribution in Fig. 2c, Fig. 4a2 – Fig. 4d2

| C      |        |        |        |         |        |        |        |        |         |         |        |        |        |        |        |
|--------|--------|--------|--------|---------|--------|--------|--------|--------|---------|---------|--------|--------|--------|--------|--------|
| Number | R1     | R2     | R3     | R4      | HC-1   | HC-2   | HC-4   | HC-5   | SV-10   | SV-25   | SV-60  | T-265  | T-275  | T-285  | T-295  |
| 1      | --     | --     | --     | --      | --     | --     | --     | --     | --      | --      | --     | --     | --     | --     | --     |
| 2      | -6.632 | -4.669 | -4.706 | -6.380  | -4.782 | -4.729 | -5.219 | -5.317 | -6.380  | -5.109  | -4.700 | -4.866 | -5.085 | -5.200 | -5.089 |
| 3      | -5.046 | -4.236 | -4.327 | -4.818  | -4.721 | -4.571 | -4.757 | -4.653 | -4.818  | -4.400  | -4.375 | -4.653 | -4.755 | -4.776 | -4.665 |
| 4      | -5.324 | -4.706 | -4.551 | -5.262  | -5.169 | -5.043 | -4.946 | -4.821 | -5.262  | -4.956  | -4.864 | -5.088 | -5.074 | -4.941 | -4.834 |
| 5      | -5.567 | -5.096 | -4.772 | -5.602  | -5.544 | -5.433 | -5.124 | -4.996 | -5.602  | -5.308  | -5.228 | -5.468 | -5.350 | -5.114 | -5.020 |
| 6      | -5.608 | -5.420 | -4.992 | -5.883  | -5.881 | -5.675 | -5.366 | -5.239 | -5.883  | -5.583  | -5.565 | -5.816 | -5.568 | -5.305 | -5.205 |
| 7      | -5.605 | -5.658 | -5.198 | -6.127  | -6.247 | -6.081 | -5.562 | -5.433 | -6.127  | -5.795  | -5.824 | -6.104 | -5.729 | -5.446 | -5.368 |
| 8      | -5.688 | -5.879 | -5.390 | -6.434  | -6.399 | -6.232 | -5.718 | -5.603 | -6.434  | -6.027  | -6.024 | -6.256 | -5.867 | -5.565 | -5.511 |
| 9      | -5.824 | -6.059 | -5.586 | -6.661  | -6.582 | -6.407 | -5.896 | -5.812 | -6.661  | -6.260  | -6.216 | -6.428 | -6.024 | -5.718 | -5.682 |
| 10     | -5.968 | -6.251 | -5.796 | -6.993  | -6.721 | -6.549 | -6.065 | -6.025 | -6.993  | -6.545  | -6.391 | -6.564 | -6.185 | -5.891 | -5.853 |
| 11     | -6.131 | -6.466 | -6.016 | -7.354  | -6.875 | -6.698 | -6.253 | -6.258 | -7.354  | -6.837  | -6.609 | -6.707 | -6.365 | -6.059 | -6.024 |
| 12     | -6.316 | -6.697 | -6.245 | -7.752  | -7.009 | -6.843 | -6.455 | -6.504 | -7.752  | -7.207  | -6.856 | -6.887 | -6.578 | -6.257 | -6.214 |
| 13     | -6.496 | -6.960 | -6.516 | -8.114  | -7.136 | -6.994 | -6.670 | -6.762 | -8.114  | -7.587  | -7.127 | -7.073 | -6.794 | -6.464 | -6.464 |
| 14     | -6.632 | -7.122 | -6.803 | -8.395  | -7.261 | -7.139 | -6.895 | -7.022 | -8.395  | -7.916  | -7.372 | -7.219 | -6.978 | -6.612 | -6.681 |
| 15     | -6.786 | -7.332 | -7.120 | -8.716  | -7.374 | -7.284 | -7.125 | -7.282 | -8.716  | -8.300  | -7.620 | -7.377 | -7.174 | -6.780 | -6.926 |
| 16     | -6.926 | -7.532 | -7.426 | -8.968  | -7.503 | -7.435 | -7.352 | -7.529 | -8.968  | -8.653  | -7.881 | -7.527 | -7.334 | -6.950 | -7.143 |
| 17     | -7.081 | -7.794 | -7.774 | -9.221  | -7.634 | -7.547 | -7.574 | -7.785 | -9.221  | -8.934  | -8.110 | -7.706 | -7.528 | -7.159 | -7.391 |
| 18     | -7.255 | -8.043 | -8.075 | -9.639  | -7.684 | -7.660 | -7.792 | -8.047 | -9.639  | -9.261  | -8.324 | -7.892 | -7.715 | -7.352 | -7.601 |
| 19     | -7.446 | -8.348 | -8.391 | -9.962  | -7.763 | -7.833 | -8.011 | -8.312 | -9.962  | -9.449  | -8.548 | -8.097 | -7.907 | -7.564 | -7.818 |
| 20     | -7.655 | -8.664 | -8.682 | -10.285 | -7.841 | -7.941 | -8.240 | -8.583 | -10.285 | -9.799  | -8.847 | -8.309 | -8.118 | -7.787 | -8.018 |
| 21     | -7.877 | -8.953 | -8.801 | -10.609 | -7.869 | -8.013 | -8.393 | -8.774 | -10.609 | -10.082 | -9.041 | -8.456 | -8.299 | -7.999 | -8.227 |
| 22     | -8.004 | -9.243 | -9.106 | -10.932 | -7.938 | -8.137 | -8.584 | -9.032 | -10.932 | -10.321 | -9.261 | -8.609 | -8.490 | -8.229 | -8.428 |
| 23     | -8.256 | -9.526 | -9.383 | -11.255 | -8.009 | -8.273 | -8.775 | -9.317 | -11.255 | -10.583 | -9.476 | -8.753 | -8.681 | -8.447 | -8.631 |

|    |         |         |         |         |        |         |         |         |         |         |         |         |         |         |         |
|----|---------|---------|---------|---------|--------|---------|---------|---------|---------|---------|---------|---------|---------|---------|---------|
| 24 | -8.631  | -9.786  | -9.521  | -11.579 | -8.089 | -8.430  | -8.999  | -9.535  | -11.579 | -10.844 | -9.690  | -8.867  | -8.872  | -8.645  | -8.808  |
| 25 | -9.001  | -10.024 | -9.675  | -11.902 | -8.160 | -8.579  | -9.285  | -9.781  | -11.902 | -11.089 | -9.879  | -9.003  | -9.062  | -8.872  | -9.031  |
| 26 | -9.187  | -10.244 | -10.079 | -12.225 | -8.268 | -8.788  | -9.527  | -10.151 | -12.225 | -11.395 | -10.061 | -9.140  | -9.253  | -9.096  | -9.256  |
| 27 | -9.321  | -10.423 | -10.265 | -12.549 | -8.331 | -8.903  | -9.739  | -10.336 | -12.549 | -11.667 | -10.259 | -9.266  | -9.444  | -9.327  | -9.489  |
| 28 | -9.568  | -10.591 | -10.465 | -12.872 | -8.381 | -9.076  | -9.848  | -10.624 | -12.872 | -11.938 | -10.495 | -9.404  | -9.635  | -9.543  | -9.744  |
| 29 | -9.780  | -10.803 | -10.520 | -13.195 | -8.461 | -9.242  | -10.103 | -10.853 | -13.195 | -12.210 | -10.708 | -9.534  | -9.826  | -9.779  | -9.987  |
| 30 | -9.948  | -11.124 | -10.841 | -13.519 | -8.534 | -9.396  | -10.322 | -11.109 | -13.519 | -12.481 | -10.918 | -9.676  | -10.017 | -10.073 | -10.320 |
| 31 | -10.243 | -11.384 | -11.071 | -13.842 | -8.606 | -9.470  | -10.578 | -11.400 | -13.842 | -12.753 | -11.127 | -9.810  | -10.208 | -10.304 | -10.534 |
| 32 | -10.434 | -11.476 | -11.290 | -14.165 | -8.672 | -9.615  | -10.796 | -11.678 | -14.165 | -13.024 | -11.337 | -9.945  | -10.399 | -10.535 | -10.843 |
| 33 | -10.725 | -11.741 | -11.509 | -14.488 | -8.738 | -9.759  | -11.015 | -11.955 | -14.488 | -13.296 | -11.546 | -10.080 | -10.589 | -10.765 | -11.034 |
| 34 | -10.962 | -11.960 | -11.727 | -14.812 | -8.804 | -9.903  | -11.234 | -12.232 | -14.812 | -13.568 | -11.756 | -10.215 | -10.780 | -10.996 | -11.209 |
| 35 | -11.199 | -12.178 | -11.946 | -15.135 | -8.870 | -10.048 | -11.452 | -12.509 | -15.135 | -13.839 | -11.965 | -10.350 | -10.971 | -11.227 | -11.529 |
| 36 | -11.435 | -12.397 | -12.165 | -15.458 | -8.936 | -10.192 | -11.671 | -12.786 | -15.458 | -14.111 | -12.175 | -10.484 | -11.162 | -11.457 | -11.780 |
| 37 | -11.672 | -12.616 | -12.384 | -15.782 | -9.002 | -10.337 | -11.889 | -13.063 | -15.782 | -14.382 | -12.384 | -10.619 | -11.353 | -11.688 | -12.032 |
| 38 | -11.909 | -12.834 | -12.603 | -16.105 | -9.068 | -10.481 | -12.108 | -13.340 | -16.105 | -14.654 | -12.594 | -10.754 | -11.544 | -11.919 | -12.284 |
| 39 | -12.145 | -13.053 | -12.821 | -16.428 | -9.134 | -10.626 | -12.327 | -13.618 | -16.428 | -14.925 | -12.803 | -10.889 | -11.735 | -12.150 | -12.535 |
| 40 | -12.382 | -13.272 | -13.040 | -16.752 | -9.200 | -10.770 | -12.545 | -13.895 | -16.752 | -15.197 | -13.013 | -11.024 | -11.925 | -12.380 | -12.787 |
| 41 | -12.619 | -13.490 | -13.259 | -17.075 | -9.265 | -10.915 | -12.764 | -14.172 | -17.075 | -15.469 | -13.222 | -11.159 | -12.116 | -12.611 | -13.038 |
| 42 | -12.856 | -13.709 | -13.478 | -17.398 | -9.331 | -11.059 | -12.983 | -14.449 | -17.398 | -15.740 | -13.432 | -11.293 | -12.307 | -12.842 | -13.290 |
| 43 | -13.092 | -13.928 | -13.697 | -17.721 | -9.397 | -11.203 | -13.201 | -14.726 | -17.721 | -16.012 | -13.641 | -11.428 | -12.498 | -13.072 | -13.542 |
| 44 | -13.329 | -14.146 | -13.915 | -18.045 | -9.463 | -11.348 | -13.420 | -15.003 | -18.045 | -16.283 | -13.851 | -11.563 | -12.689 | -13.303 | -13.793 |
| 45 | -13.566 | -14.365 | -14.134 | -18.368 | -9.529 | -11.492 | -13.638 | -15.280 | -18.368 | -16.555 | -14.060 | -11.698 | -12.880 | -13.534 | -14.045 |

366 Note: The olefin distribution of C31~C45 was obtained by extrapolation.

367

368

**Table S5-5** The detailed data of the paraffin distribution in Fig. 2c, Fig. 4a3 – Fig. 4d3

| C      |        |        |        |        |        |        |        |        |        |        |        |        |        |        |        |
|--------|--------|--------|--------|--------|--------|--------|--------|--------|--------|--------|--------|--------|--------|--------|--------|
| Number | R1     | R2     | R3     | R4     | HC-1   | HC-2   | HC-4   | HC-5   | SV-10  | SV-25  | SV-60  | T-265  | T-275  | T-285  | T-295  |
| 1      | -3.275 | -2.745 | -3.073 | -2.168 | -3.926 | -3.439 | -3.003 | -2.696 | -2.168 | -2.337 | -2.736 | -3.475 | -3.331 | -3.266 | -3.030 |
| 2      | -5.287 | -4.899 | -5.419 | -3.923 | -6.180 | -5.658 | -5.771 | -5.465 | -3.923 | -4.059 | -4.832 | -5.738 | -5.816 | -6.150 | -5.803 |
| 3      | -5.849 | -5.409 | -5.630 | -4.807 | -6.301 | -5.874 | -6.017 | -5.898 | -4.807 | -5.072 | -5.457 | -5.931 | -6.075 | -6.313 | -6.120 |
| 4      | -6.197 | -5.627 | -5.666 | -5.109 | -6.507 | -6.114 | -5.989 | -5.829 | -5.109 | -5.419 | -5.725 | -6.131 | -6.171 | -6.260 | -6.080 |
| 5      | -6.529 | -6.013 | -5.867 | -5.258 | -6.796 | -6.464 | -6.148 | -5.970 | -5.258 | -5.692 | -6.070 | -6.467 | -6.419 | -6.402 | -6.209 |
| 6      | -6.713 | -6.280 | -6.071 | -5.434 | -6.998 | -6.759 | -6.331 | -6.089 | -5.434 | -5.832 | -6.330 | -6.783 | -6.564 | -6.538 | -6.397 |
| 7      | -6.788 | -6.496 | -6.261 | -5.562 | -7.355 | -7.043 | -6.451 | -6.168 | -5.562 | -5.929 | -6.554 | -7.005 | -6.615 | -6.603 | -6.509 |
| 8      | -6.910 | -6.672 | -6.389 | -5.661 | -7.565 | -7.169 | -6.526 | -6.210 | -5.661 | -5.991 | -6.652 | -7.142 | -6.693 | -6.696 | -6.586 |
| 9      | -7.012 | -6.844 | -6.536 | -5.787 | -7.648 | -7.294 | -6.609 | -6.280 | -5.787 | -6.091 | -6.758 | -7.237 | -6.786 | -6.807 | -6.715 |
| 10     | -7.134 | -6.960 | -6.661 | -5.908 | -7.752 | -7.388 | -6.674 | -6.342 | -5.908 | -6.167 | -6.801 | -7.280 | -6.859 | -6.837 | -6.760 |
| 11     | -7.279 | -7.055 | -6.751 | -6.016 | -7.863 | -7.474 | -6.738 | -6.409 | -6.016 | -6.242 | -6.810 | -7.384 | -6.898 | -6.869 | -6.868 |
| 12     | -7.362 | -7.088 | -6.849 | -6.119 | -7.966 | -7.555 | -6.806 | -6.482 | -6.119 | -6.304 | -6.818 | -7.349 | -6.918 | -6.870 | -6.954 |
| 13     | -7.424 | -7.136 | -6.928 | -6.252 | -8.030 | -7.615 | -6.868 | -6.561 | -6.252 | -6.425 | -6.827 | -7.379 | -6.959 | -6.911 | -6.975 |
| 14     | -7.453 | -7.213 | -6.959 | -6.362 | -8.095 | -7.650 | -6.937 | -6.642 | -6.362 | -6.552 | -6.856 | -7.407 | -6.993 | -7.005 | -7.040 |
| 15     | -7.435 | -7.246 | -7.000 | -6.473 | -8.113 | -7.673 | -6.982 | -6.730 | -6.473 | -6.711 | -6.880 | -7.410 | -7.031 | -7.062 | -7.091 |
| 16     | -7.448 | -7.270 | -7.054 | -6.588 | -8.127 | -7.673 | -7.019 | -6.790 | -6.588 | -6.869 | -6.935 | -7.422 | -7.074 | -7.121 | -7.176 |
| 17     | -7.412 | -7.266 | -7.083 | -6.692 | -8.170 | -7.679 | -7.049 | -6.856 | -6.692 | -7.018 | -6.994 | -7.405 | -7.080 | -7.140 | -7.214 |
| 18     | -7.410 | -7.283 | -7.133 | -6.799 | -8.244 | -7.691 | -7.101 | -6.931 | -6.799 | -7.138 | -7.055 | -7.428 | -7.114 | -7.198 | -7.264 |
| 19     | -7.438 | -7.267 | -7.152 | -6.889 | -8.261 | -7.708 | -7.160 | -7.010 | -6.889 | -7.217 | -7.083 | -7.431 | -7.104 | -7.207 | -7.294 |
| 20     | -7.474 | -7.313 | -7.267 | -7.057 | -8.282 | -7.716 | -7.216 | -7.143 | -7.057 | -7.341 | -7.150 | -7.381 | -7.154 | -7.271 | -7.321 |
| 21     | -7.497 | -7.356 | -7.351 | -7.226 | -8.284 | -7.701 | -7.277 | -7.175 | -7.226 | -7.438 | -7.219 | -7.430 | -7.194 | -7.330 | -7.354 |
| 22     | -7.530 | -7.409 | -7.447 | -7.415 | -8.308 | -7.734 | -7.352 | -7.287 | -7.415 | -7.524 | -7.290 | -7.447 | -7.240 | -7.388 | -7.395 |
| 23     | -7.420 | -7.475 | -7.553 | -7.602 | -8.317 | -7.755 | -7.462 | -7.422 | -7.602 | -7.602 | -7.367 | -7.466 | -7.295 | -7.453 | -7.449 |

|    |        |        |         |         |        |        |        |         |         |         |        |        |        |        |        |
|----|--------|--------|---------|---------|--------|--------|--------|---------|---------|---------|--------|--------|--------|--------|--------|
| 24 | -7.475 | -7.549 | -7.732  | -7.768  | -8.360 | -7.760 | -7.537 | -7.495  | -7.768  | -7.683  | -7.434 | -7.503 | -7.348 | -7.541 | -7.522 |
| 25 | -7.533 | -7.630 | -7.842  | -7.940  | -8.336 | -7.774 | -7.614 | -7.586  | -7.940  | -7.762  | -7.509 | -7.539 | -7.430 | -7.610 | -7.588 |
| 26 | -7.585 | -7.713 | -8.075  | -8.099  | -8.337 | -7.837 | -7.692 | -7.712  | -8.099  | -7.866  | -7.590 | -7.579 | -7.500 | -7.688 | -7.666 |
| 27 | -7.646 | -7.812 | -8.235  | -8.244  | -8.382 | -7.879 | -7.751 | -7.783  | -8.244  | -7.969  | -7.668 | -7.628 | -7.570 | -7.711 | -7.750 |
| 28 | -7.722 | -7.909 | -8.367  | -8.380  | -8.450 | -7.928 | -7.823 | -7.867  | -8.380  | -8.073  | -7.748 | -7.681 | -7.643 | -7.870 | -7.843 |
| 29 | -7.777 | -8.002 | -8.506  | -8.512  | -8.487 | -7.953 | -7.894 | -7.992  | -8.512  | -8.181  | -7.831 | -7.738 | -7.718 | -7.960 | -7.937 |
| 30 | -7.835 | -8.089 | -8.621  | -8.645  | -8.519 | -8.002 | -8.006 | -8.070  | -8.645  | -8.292  | -7.916 | -7.792 | -7.794 | -8.044 | -8.029 |
| 31 | -7.907 | -8.183 | -8.735  | -8.795  | -8.497 | -7.990 | -8.090 | -8.253  | -8.795  | -8.413  | -8.017 | -7.855 | -7.875 | -8.134 | -8.141 |
| 32 | -7.986 | -8.270 | -8.849  | -8.929  | -8.531 | -8.041 | -8.182 | -8.360  | -8.929  | -8.523  | -8.100 | -7.910 | -7.953 | -8.223 | -8.239 |
| 33 | -8.068 | -8.352 | -8.970  | -9.068  | -8.570 | -8.095 | -8.273 | -8.468  | -9.068  | -8.631  | -8.184 | -7.962 | -8.029 | -8.314 | -8.347 |
| 34 | -8.153 | -8.438 | -9.089  | -9.211  | -8.608 | -8.150 | -8.366 | -8.576  | -9.211  | -8.740  | -8.268 | -8.018 | -8.108 | -8.404 | -8.460 |
| 35 | -8.202 | -8.524 | -9.202  | -9.356  | -8.650 | -8.208 | -8.459 | -8.683  | -9.356  | -8.843  | -8.351 | -8.075 | -8.185 | -8.497 | -8.561 |
| 36 | -8.274 | -8.610 | -9.348  | -9.501  | -8.691 | -8.264 | -8.555 | -8.795  | -9.501  | -8.950  | -8.433 | -8.134 | -8.259 | -8.591 | -8.665 |
| 37 | -8.344 | -8.692 | -9.394  | -9.642  | -8.733 | -8.322 | -8.647 | -8.905  | -9.642  | -9.053  | -8.516 | -8.193 | -8.338 | -8.671 | -8.774 |
| 38 | -8.434 | -8.780 | -9.476  | -9.784  | -8.772 | -8.381 | -8.742 | -9.014  | -9.784  | -9.157  | -8.597 | -8.252 | -8.416 | -8.766 | -8.872 |
| 39 | -8.488 | -8.862 | -9.562  | -9.923  | -8.812 | -8.437 | -8.837 | -9.123  | -9.923  | -9.260  | -8.680 | -8.307 | -8.497 | -8.852 | -8.974 |
| 40 | -8.556 | -8.948 | -9.663  | -10.061 | -8.852 | -8.494 | -8.931 | -9.230  | -10.061 | -9.364  | -8.760 | -8.363 | -8.577 | -8.939 | -9.070 |
| 41 | -8.626 | -9.029 | -9.796  | -10.207 | -8.889 | -8.552 | -9.022 | -9.338  | -10.207 | -9.471  | -8.842 | -8.422 | -8.659 | -9.022 | -9.168 |
| 42 | -8.699 | -9.112 | -9.937  | -10.349 | -8.930 | -8.606 | -9.114 | -9.443  | -10.349 | -9.576  | -8.923 | -8.477 | -8.737 | -9.109 | -9.258 |
| 43 | -8.773 | -9.192 | -10.071 | -10.491 | -8.973 | -8.665 | -9.205 | -9.550  | -10.491 | -9.680  | -9.004 | -8.537 | -8.817 | -9.196 | -9.352 |
| 44 | -8.841 | -9.271 | -10.203 | -10.633 | -9.016 | -8.722 | -9.295 | -9.654  | -10.633 | -9.784  | -9.090 | -8.596 | -8.896 | -9.281 | -9.444 |
| 45 | -8.915 | -9.354 | -10.326 | -10.775 | -9.062 | -8.780 | -9.387 | -9.761  | -10.775 | -9.886  | -9.178 | -8.662 | -8.984 | -9.374 | -9.537 |
| 46 | -8.992 | -9.435 | -10.439 | -10.917 | -9.110 | -8.841 | -9.476 | -9.863  | -10.917 | -9.985  | -9.269 | -8.729 | -9.063 | -9.463 | -9.628 |
| 47 | -9.053 | -9.516 | -10.531 | -11.059 | -9.163 | -8.907 | -9.565 | -9.970  | -11.059 | -10.085 | -9.365 | -8.799 | -9.150 | -9.557 | -9.722 |
| 48 | -9.130 | -9.599 | -10.634 | -11.201 | -9.219 | -8.968 | -9.655 | -10.075 | -11.201 | -10.187 | -9.461 | -8.871 | -9.245 | -9.649 | -9.816 |
| 49 | -9.191 | -9.683 | -10.747 | -11.344 | -9.285 | -9.039 | -9.747 | -10.180 | -11.344 | -10.288 | -9.561 | -8.944 | -9.339 | -9.743 | -9.914 |

|    |         |         |         |         |         |         |         |         |         |         |         |         |         |         |         |
|----|---------|---------|---------|---------|---------|---------|---------|---------|---------|---------|---------|---------|---------|---------|---------|
| 50 | -9.257  | -9.769  | -10.932 | -11.486 | -9.345  | -9.104  | -9.839  | -10.289 | -11.486 | -10.395 | -9.662  | -9.017  | -9.435  | -9.844  | -10.017 |
| 51 | -9.317  | -9.849  | -10.987 | -11.628 | -9.400  | -9.175  | -9.928  | -10.395 | -11.628 | -10.499 | -9.760  | -9.087  | -9.529  | -9.928  | -10.109 |
| 52 | -9.370  | -9.929  | -11.063 | -11.770 | -9.464  | -9.242  | -10.022 | -10.502 | -11.770 | -10.610 | -9.861  | -9.159  | -9.628  | -10.032 | -10.213 |
| 53 | -9.429  | -10.015 | -11.178 | -11.912 | -9.513  | -9.315  | -10.112 | -10.607 | -11.912 | -10.720 | -9.962  | -9.225  | -9.724  | -10.121 | -10.310 |
| 54 | -9.485  | -10.093 | -11.270 | -12.054 | -9.562  | -9.382  | -10.206 | -10.717 | -12.054 | -10.833 | -10.055 | -9.296  | -9.822  | -10.210 | -10.413 |
| 55 | -9.527  | -10.173 | -11.409 | -12.197 | -9.619  | -9.457  | -10.294 | -10.827 | -12.197 | -10.947 | -10.152 | -9.366  | -9.919  | -10.308 | -10.513 |
| 56 | -9.577  | -10.264 | -11.499 | -12.339 | -9.674  | -9.522  | -10.391 | -10.934 | -12.339 | -11.058 | -10.246 | -9.427  | -10.009 | -10.404 | -10.606 |
| 57 | -9.632  | -10.322 | -11.612 | -12.481 | -9.714  | -9.589  | -10.478 | -11.043 | -12.481 | -11.170 | -10.340 | -9.497  | -10.108 | -10.486 | -10.698 |
| 58 | -9.666  | -10.415 | -11.693 | -12.623 | -9.763  | -9.660  | -10.567 | -11.152 | -12.623 | -11.280 | -10.434 | -9.555  | -10.197 | -10.580 | -10.798 |
| 59 | -9.725  | -10.479 | -11.787 | -12.765 | -9.795  | -9.720  | -10.663 | -11.258 | -12.765 | -11.392 | -10.520 | -9.623  | -10.291 | -10.670 | -10.891 |
| 60 | -9.754  | -10.560 | -11.871 | -12.907 | -9.847  | -9.794  | -10.753 | -11.365 | -12.907 | -11.506 | -10.607 | -9.679  | -10.380 | -10.757 | -10.980 |
| 61 | -9.814  | -10.626 | -11.956 | -13.050 | -9.891  | -9.862  | -10.843 | -11.471 | -13.050 | -11.613 | -10.696 | -9.742  | -10.463 | -10.832 | -11.073 |
| 62 | -9.860  | -10.710 | -12.152 | -13.192 | -9.902  | -9.922  | -10.937 | -11.580 | -13.192 | -11.722 | -10.782 | -9.801  | -10.561 | -10.945 | -11.166 |
| 63 | -9.868  | -10.758 | -12.262 | -13.334 | -9.964  | -9.982  | -11.021 | -11.684 | -13.334 | -11.834 | -10.861 | -9.870  | -10.645 | -11.047 | -11.253 |
| 64 | -9.930  | -10.840 | -12.373 | -13.476 | -9.990  | -10.040 | -11.111 | -11.792 | -13.476 | -11.941 | -10.947 | -9.919  | -10.732 | -11.137 | -11.354 |
| 65 | -9.996  | -10.907 | -12.483 | -13.618 | -10.034 | -10.091 | -11.203 | -11.891 | -13.618 | -12.047 | -11.026 | -9.974  | -10.798 | -11.173 | -11.418 |
| 66 | -10.002 | -10.972 | -12.594 | -13.760 | -10.083 | -10.162 | -11.281 | -11.998 | -13.760 | -12.163 | -11.107 | -10.050 | -10.900 | -11.323 | -11.543 |
| 67 | -10.057 | -11.019 | -12.705 | -13.903 | -10.128 | -10.220 | -11.379 | -12.105 | -13.903 | -12.266 | -11.186 | -10.082 | -10.967 | -11.376 | -11.617 |
| 68 | -10.105 | -11.110 | -12.815 | -14.045 | -10.171 | -10.288 | -11.455 | -12.203 | -14.045 | -12.377 | -11.264 | -10.140 | -11.058 | -11.501 | -11.715 |
| 69 | -10.112 | -11.151 | -12.926 | -14.187 | -10.194 | -10.314 | -11.546 | -12.311 | -14.187 | -12.490 | -11.335 | -10.207 | -11.136 | -11.589 | -11.794 |
| 70 | -10.172 | -11.232 | -13.037 | -14.329 | -10.247 | -10.413 | -11.640 | -12.408 | -14.329 | -12.604 | -11.421 | -10.244 | -11.207 | -11.634 | -11.896 |
| 71 | -10.201 | -11.255 | -13.148 | -14.471 | -10.301 | -10.416 | -11.710 | -12.511 | -14.471 | -12.714 | -11.495 | -10.319 | -11.307 | -11.806 | -11.994 |
| 72 | -10.224 | -11.351 | -13.258 | -14.614 | -10.322 | -10.502 | -11.805 | -12.608 | -14.614 | -12.835 | -11.559 | -10.360 | -11.357 | -11.871 | -12.072 |
| 73 | -10.283 | -11.406 | -13.369 | -14.756 | -10.379 | -10.543 | -11.877 | -12.722 | -14.756 | -12.948 | -11.642 | -10.408 | -11.437 | -11.946 | -12.206 |
| 74 | -10.299 | -11.446 | -13.480 | --      | -10.413 | -10.589 | -11.985 | -12.804 | --      | -13.064 | -11.717 | -10.494 | -11.532 | -12.046 | -12.273 |
| 75 | -10.344 | -11.534 | -13.591 | --      | -10.462 | -10.637 | -12.035 | -12.920 | --      | -13.191 | -11.786 | -10.513 | -11.618 | -12.183 | -12.394 |

|     |         |         |         |    |         |         |         |         |    |         |         |         |         |         |         |
|-----|---------|---------|---------|----|---------|---------|---------|---------|----|---------|---------|---------|---------|---------|---------|
| 76  | -10.341 | -11.546 | -13.702 | -- | -10.470 | -10.698 | -12.138 | -13.011 | -- | -13.323 | -11.864 | -10.576 | -11.669 | -12.314 | -12.501 |
| 77  | -10.396 | -11.619 | -13.812 | -- | -10.522 | -10.727 | -12.203 | -13.132 | -- | -13.445 | -11.929 | -10.608 | -11.761 | -12.391 | -12.641 |
| 78  | -10.433 | -11.682 | -13.923 | -- | -10.572 | -10.791 | -12.306 | -13.235 | -- | -13.575 | -12.002 | -10.670 | -11.831 | -12.516 | -12.691 |
| 79  | -10.469 | -11.739 | -14.034 | -- | -10.634 | -10.845 | -12.348 | -13.328 | -- | -13.734 | -12.076 | -10.740 | -11.929 | -12.577 | -12.836 |
| 80  | -10.540 | -11.797 | -14.145 | -- | -10.667 | -10.900 | -12.471 | -13.405 | -- | -13.879 | -12.165 | -10.783 | -11.960 | -12.757 | -12.914 |
| 81  | -10.584 | -11.854 | -14.256 | -- | -10.683 | -10.954 | -12.520 | -13.516 | -- | -13.977 | -12.211 | -10.836 | -12.072 | -12.820 | -13.064 |
| 82  | -10.531 | -11.912 | -14.367 | -- | -10.721 | -11.009 | -12.631 | -13.617 | -- | -14.105 | -12.292 | -10.889 | -12.144 | -13.003 | --      |
| 83  | -10.587 | -11.969 | -14.477 | -- | -10.740 | -11.063 | -12.697 | -13.752 | -- | -14.234 | -12.358 | -10.942 | -12.221 | -13.087 | --      |
| 84  | -10.682 | -12.027 | -14.588 | -- | -10.759 | -11.118 | -12.745 | -13.788 | -- | -14.362 | -12.449 | -10.994 | -12.299 | -13.246 | --      |
| 85  | -10.709 | -12.084 | -14.699 | -- | -10.803 | -11.172 | -12.829 | -13.921 | -- | -14.490 | -12.507 | -11.047 | -12.365 | -13.310 | --      |
| 86  | -10.741 | -12.142 | -14.810 | -- | -10.828 | -11.227 | -12.875 | --      | -- | -14.619 | -12.578 | -11.100 | -12.396 | -13.494 | --      |
| 87  | -10.649 | -12.199 | -14.921 | -- | -10.862 | -11.281 | -13.012 | --      | -- | -14.747 | -12.659 | -11.153 | -12.506 | -13.724 | --      |
| 88  | -10.692 | -12.257 | -15.032 | -- | -10.881 | -11.336 | -13.142 | --      | -- | -14.876 | -12.711 | -11.206 | -12.627 | --      | --      |
| 89  | -10.700 | -12.315 | -15.143 | -- | -10.910 | -11.390 | --      | --      | -- | -15.004 | -12.800 | -11.259 | -12.734 | --      | --      |
| 90  | -10.769 | -12.372 | -15.254 | -- | -10.947 | -11.445 | --      | --      | -- | -15.132 | -12.871 | -11.312 | -12.825 | --      | --      |
| 91  | -10.838 | -12.430 | --      | -- | -10.998 | -11.499 | --      | --      | -- | -15.261 | -12.933 | -11.365 | -12.977 | --      | --      |
| 92  | -10.874 | -12.487 | --      | -- | -11.029 | -11.554 | --      | --      | -- | -15.389 | -13.047 | -11.418 | --      | --      | --      |
| 93  | -10.789 | -12.545 | --      | -- | -11.057 | -11.609 | --      | --      | -- | -15.518 | -13.096 | -11.471 | --      | --      | --      |
| 94  | -10.901 | -12.602 | --      | -- | -11.081 | -11.663 | --      | --      | -- | -15.646 | -13.127 | -11.524 | --      | --      | --      |
| 95  | -10.901 | -12.660 | --      | -- | -11.149 | -11.718 | --      | --      | -- | --      | -13.272 | -11.577 | --      | --      | --      |
| 96  | -10.952 | -12.717 | --      | -- | -11.193 | -11.772 | --      | --      | -- | --      | -13.301 | -11.630 | --      | --      | --      |
| 97  | -10.955 | --      | --      | -- | -11.219 | -11.827 | --      | --      | -- | --      | -13.386 | -11.683 | --      | --      | --      |
| 98  | -11.013 | --      | --      | -- | -11.284 | -11.882 | --      | --      | -- | --      | -13.429 | -11.736 | --      | --      | --      |
| 99  | -11.026 | --      | --      | -- | -11.287 | -11.936 | --      | --      | -- | --      | -13.520 | -11.789 | --      | --      | --      |
| 100 | -11.038 | --      | --      | -- | -11.355 | -11.991 | --      | --      | -- | --      | -13.592 | -11.842 | --      | --      | --      |



## References

1. D. L. King, J. A. Cusumano and R. L. Garten, *Catal. Rev.*, 1981, 23, 233-263.
2. E. Iglesia, S. C. Reyes and R. J. Madon, *J. Catal.*, 1991, 129, 238-256.
3. T. Olewski, B. Todic, L. Nowicki, N. Nikacevic and D. B. Bukur, *Chem. Eng. Res. Des.*, 2015, 95, 1-11.
4. G. P. van der Laan and A. Beenackers, *Ind. Eng. Chem. Res.*, 1999, 38, 1277-1290.
5. B. Todic, T. Bhatelia, G. F. Froment, W. Ma, G. Jacobs, B. H. Davis and D. B. Bukur, *Ind. Eng. Chem. Res.*, 2013, 52, 669-679.
6. C. G. Visconti, E. Tronconi, L. Lietti, R. Zennaro and P. Forzatti, *Chem. Eng. Sci.*, 2007, 62, 5338-5343.
7. J. Gaube and H. F. Klein, *J. Mol. Catal. A: Chem.*, 2008, 283, 60-68.
8. C. M. Masuku, D. Hildebrandt and D. Glasser, *Chem. Eng. Sci.*, 2011, 66, 6254-6263.
9. H. G. Stenger Jr, *J. Catal.*, 1985, 92, 426-428.
